# Supplementary material for: A revisit to the Hantzsch reaction: Unexpected products beyond 1,4-dihydropyridines
Source: Royal Society of Chemistry journal article supplement (doi:10.1039/b906358g), 2009-01-01

# A Revisit to the Hantzsch Reaction: Unexpected products beyond 1,4-dihydropyridines

Li Shen, Song Cao\*, Jingjing Wu, Jian Zhang, Hui Li, Nianjin Liu and Xuhong Qian\*

Shanghai Key Laboratory of Chemical Biology, Center of Fluorine Chemical Technology, School of

Pharmacy, East China University of Science and Technology, Shanghai, 200237, China

Fax: +86(21)64252603

E-mail: scao@ecust.edu.cn; xhqian@ecust.edu.cn

## Supporting information:

### Spectra of the pyridine derivatives:

#### Diethyl 2-phenyl-4, 6-dimethylpyridine-3, 5-dicarboxylate (3a).

#### <sup>1</sup>H NMR:

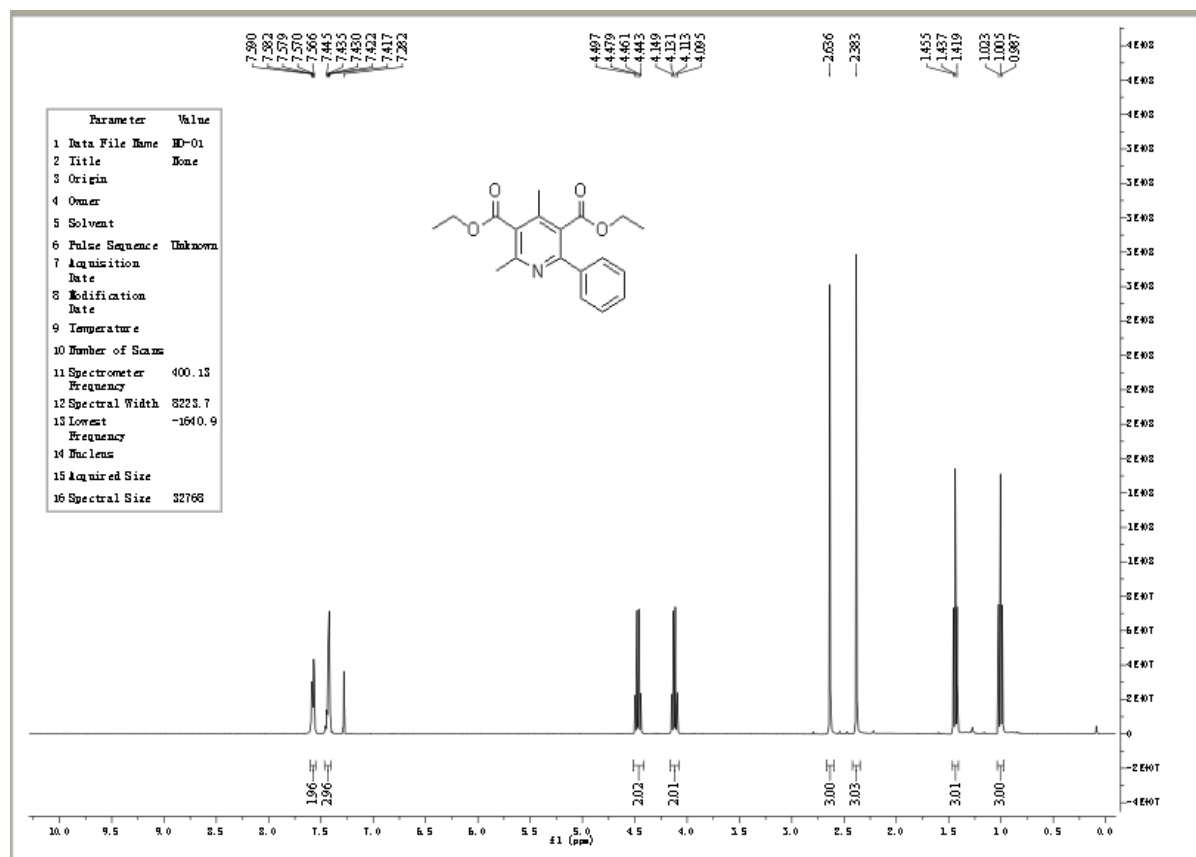

#### <sup>13</sup>C NMR:

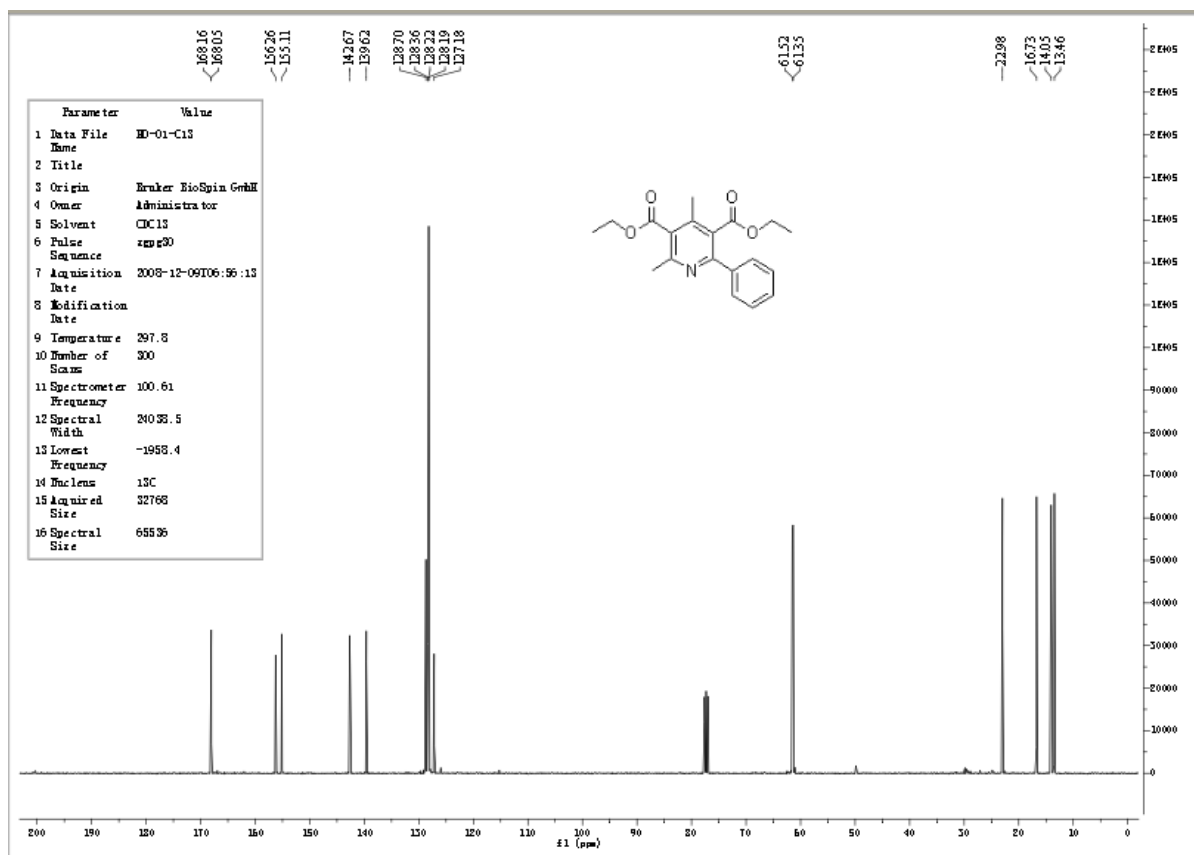

**HRMS:**

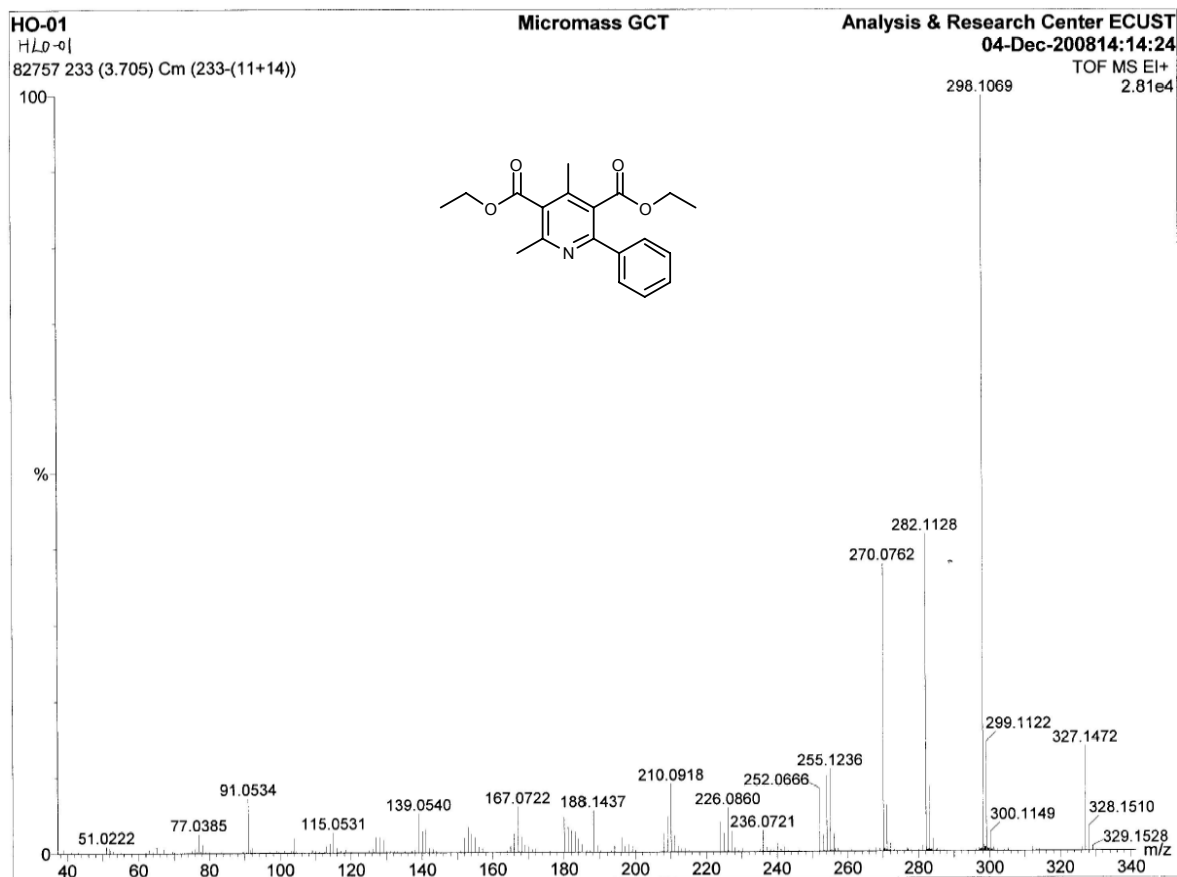

# Diethyl 2-(4-nitrophenyl)-4,6-dimethylpyridine-3,5-dicarboxylate (3b).

## <sup>1</sup>H NMR:

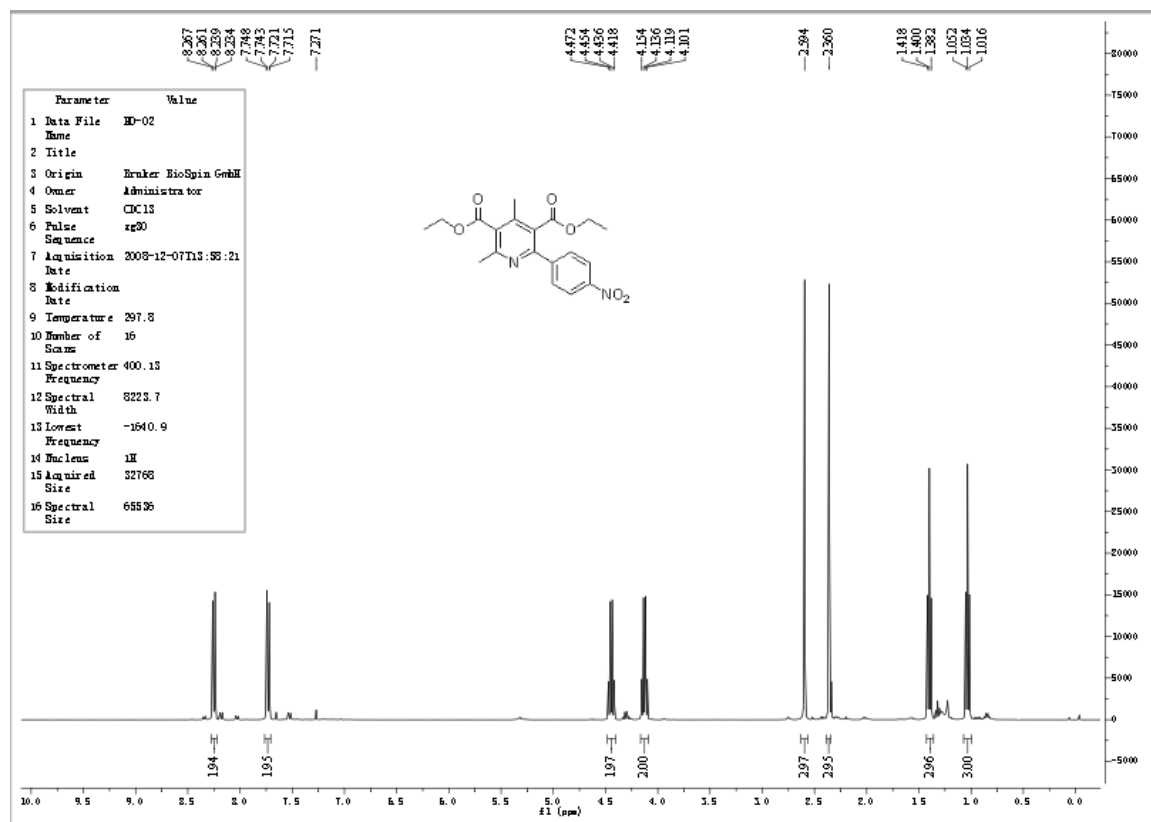

## <sup>13</sup>C NMR:

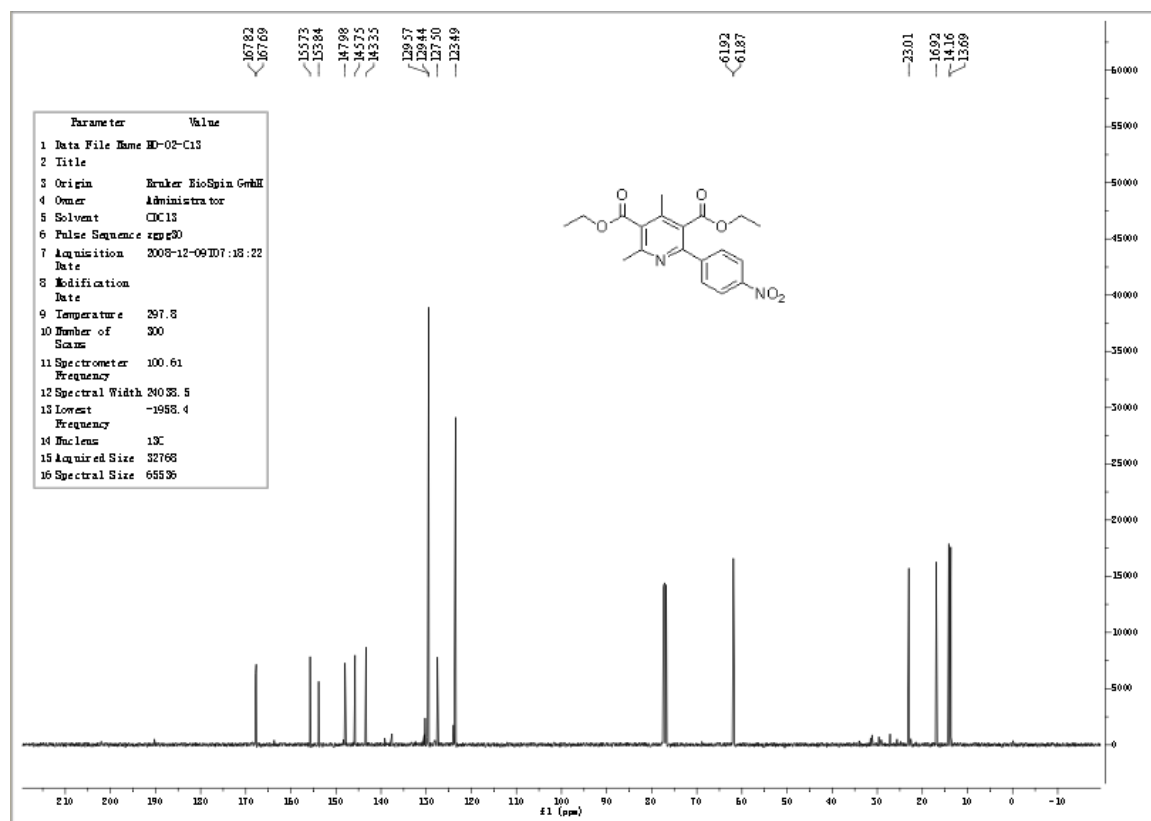

HRMS:

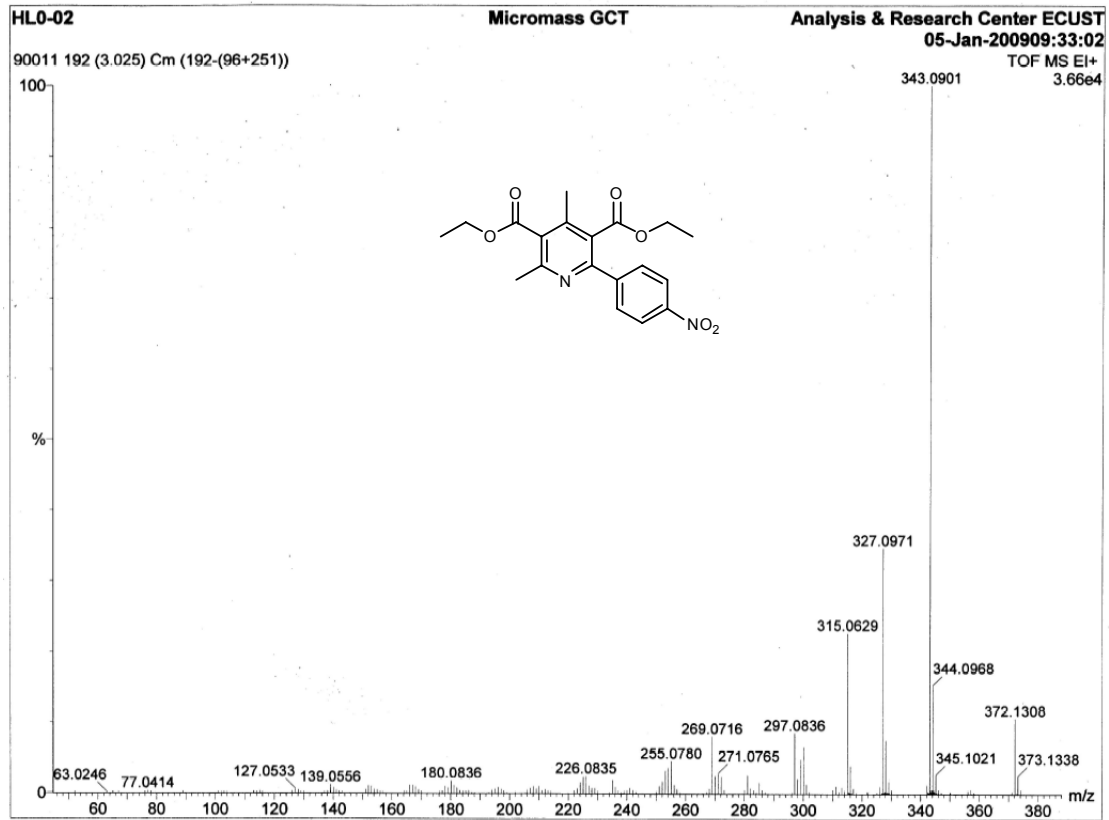

Diethyl 2-(4-methylphenyl)-4,6-dimethylpyridine-3,5-dicarboxylate (3c).

<sup>1</sup>H NMR:

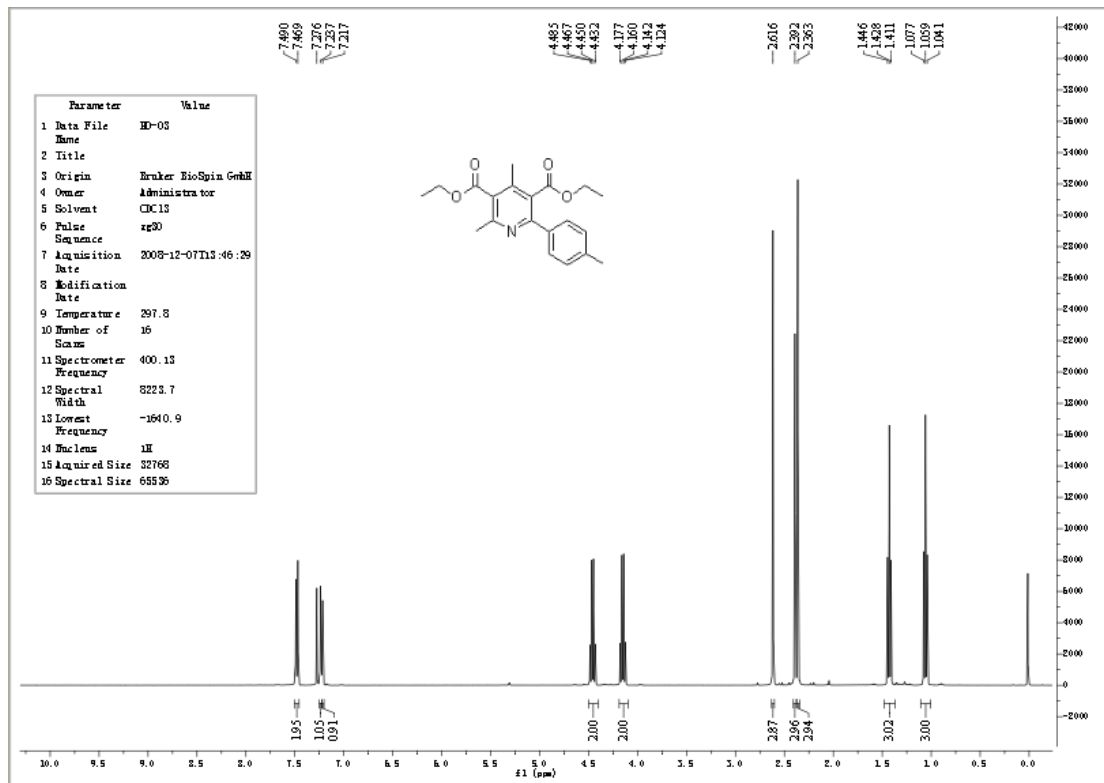

**<sup>13</sup>C NMR:**

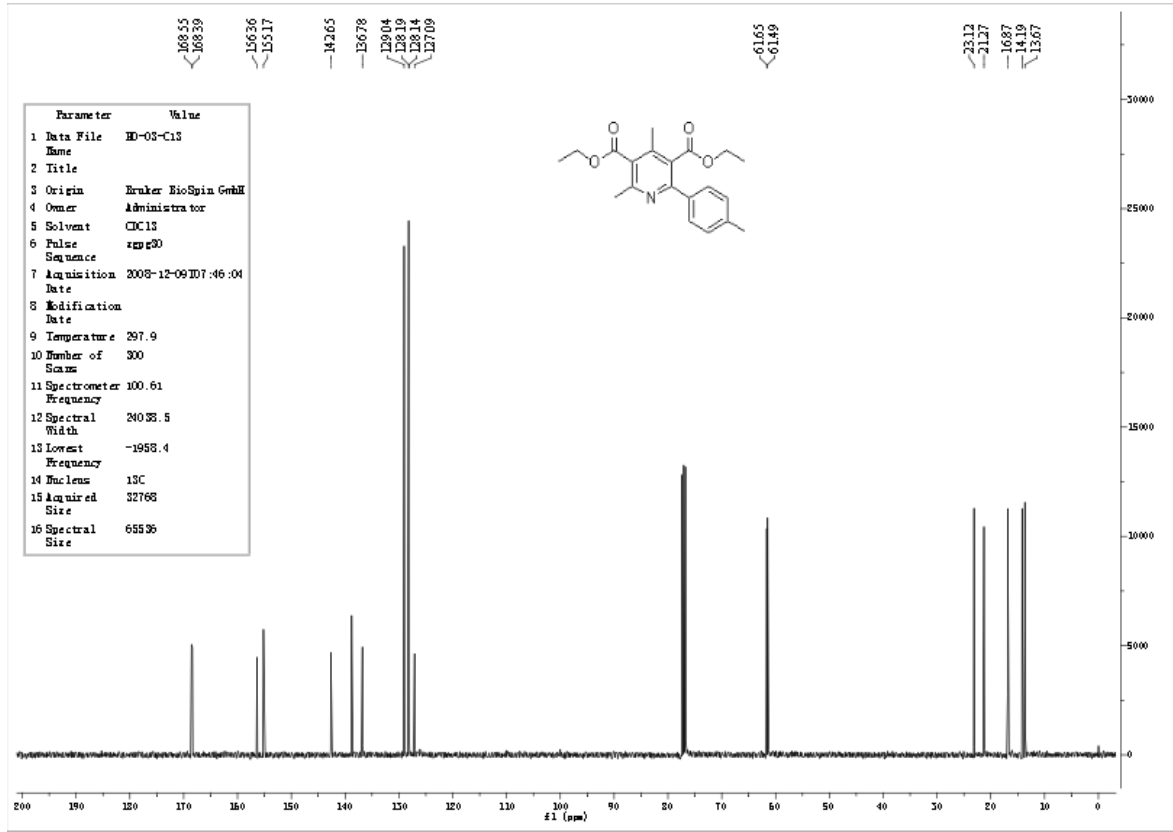

**HRMS:**

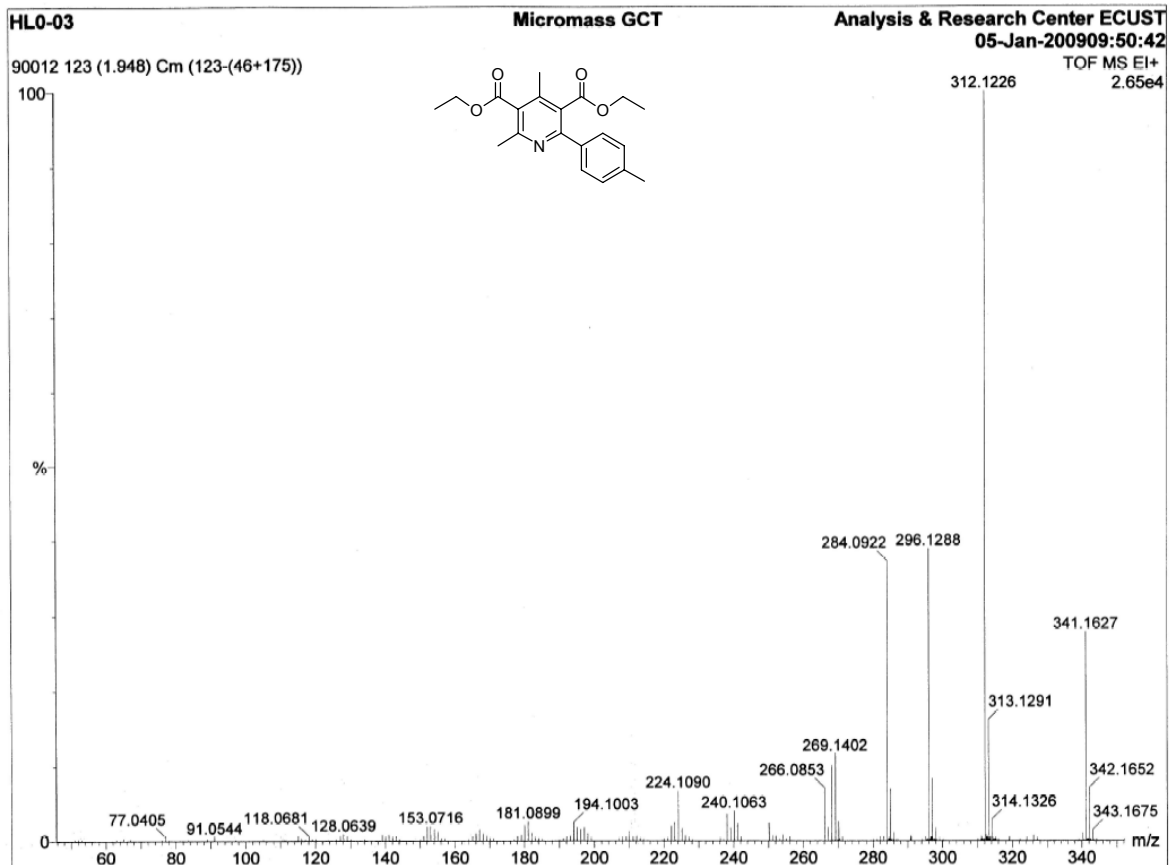

# Dimethyl 2-phenyl-4, 6-dimethylpyridine-3, 5-dicarboxylate (3d).

## <sup>1</sup>H NMR:

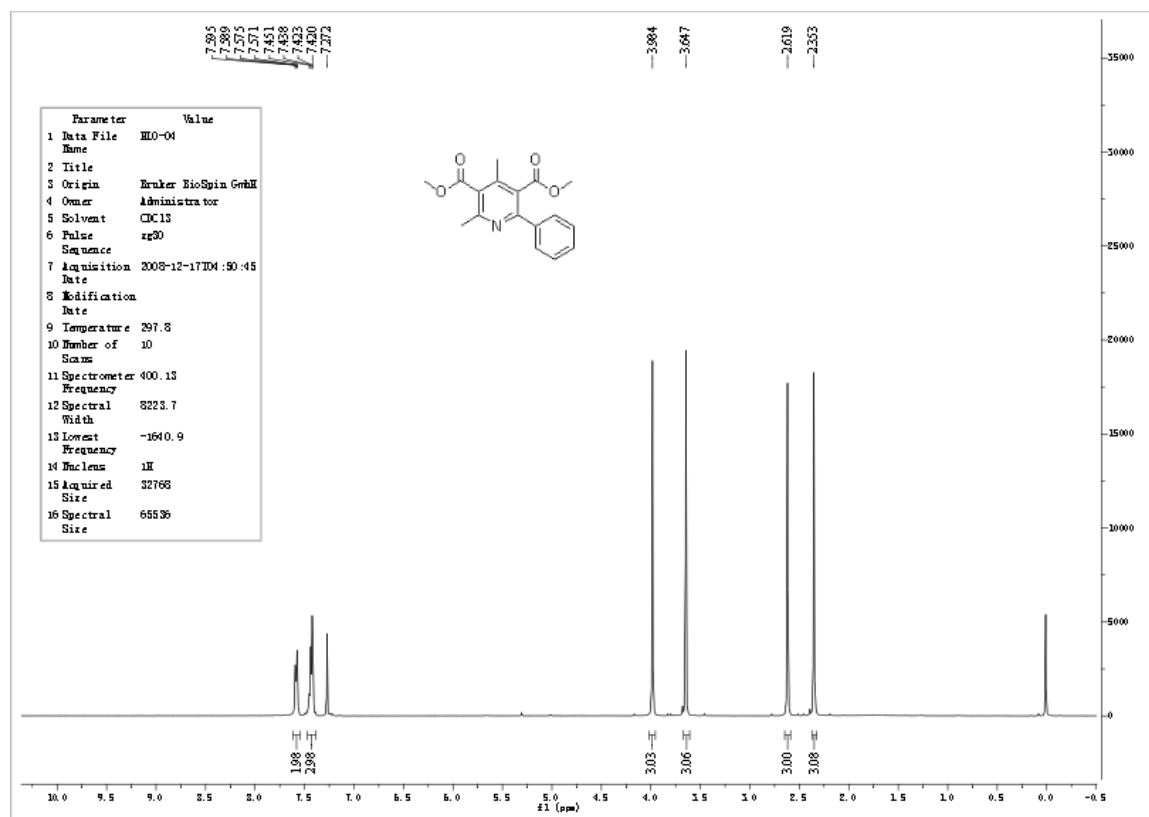

## <sup>13</sup>C NMR:

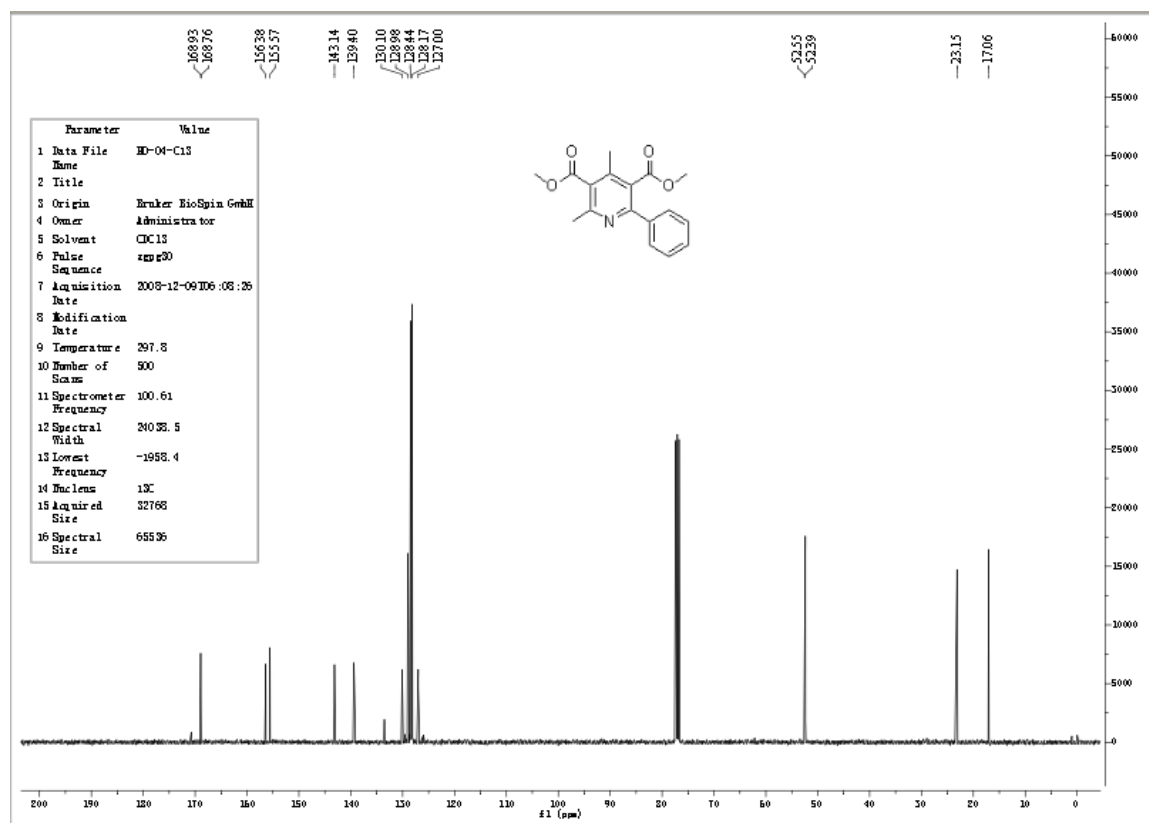

HRMS:

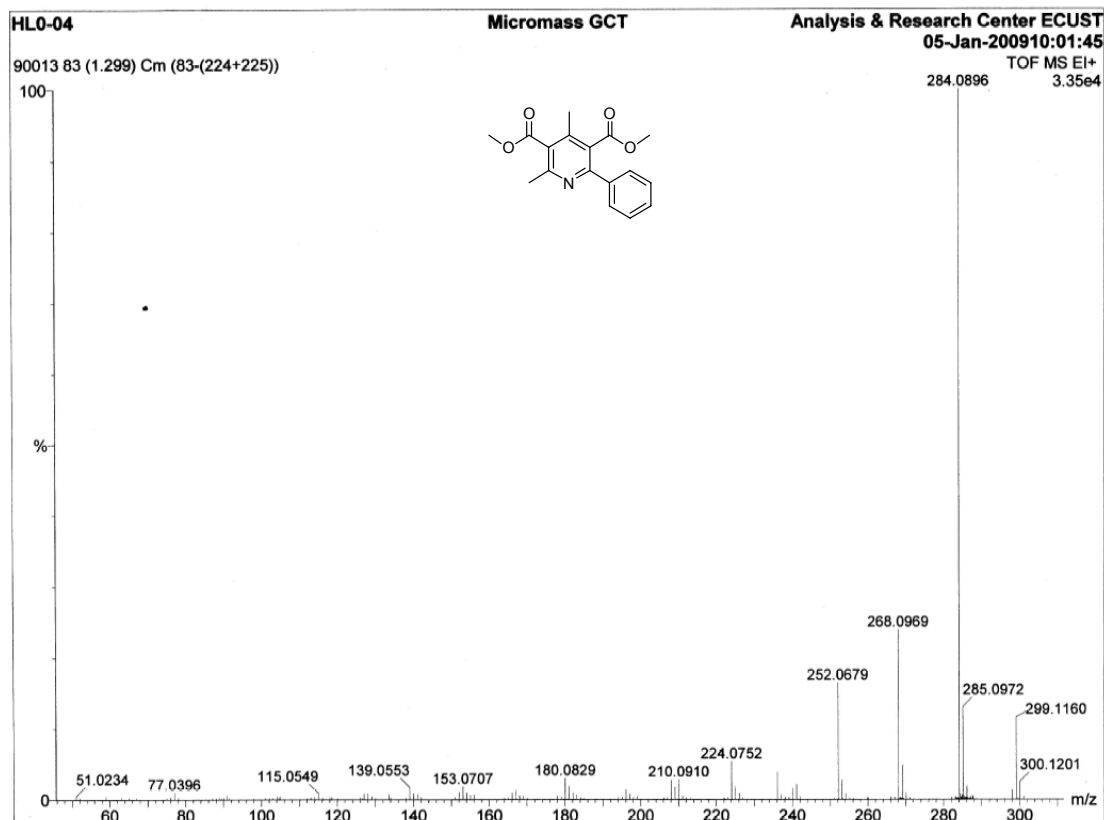

Diethyl 2-(4-bromophenyl)-4,6-dimethylpyridine-3,5-dicarboxylate (3e).

<sup>1</sup>H NMR:

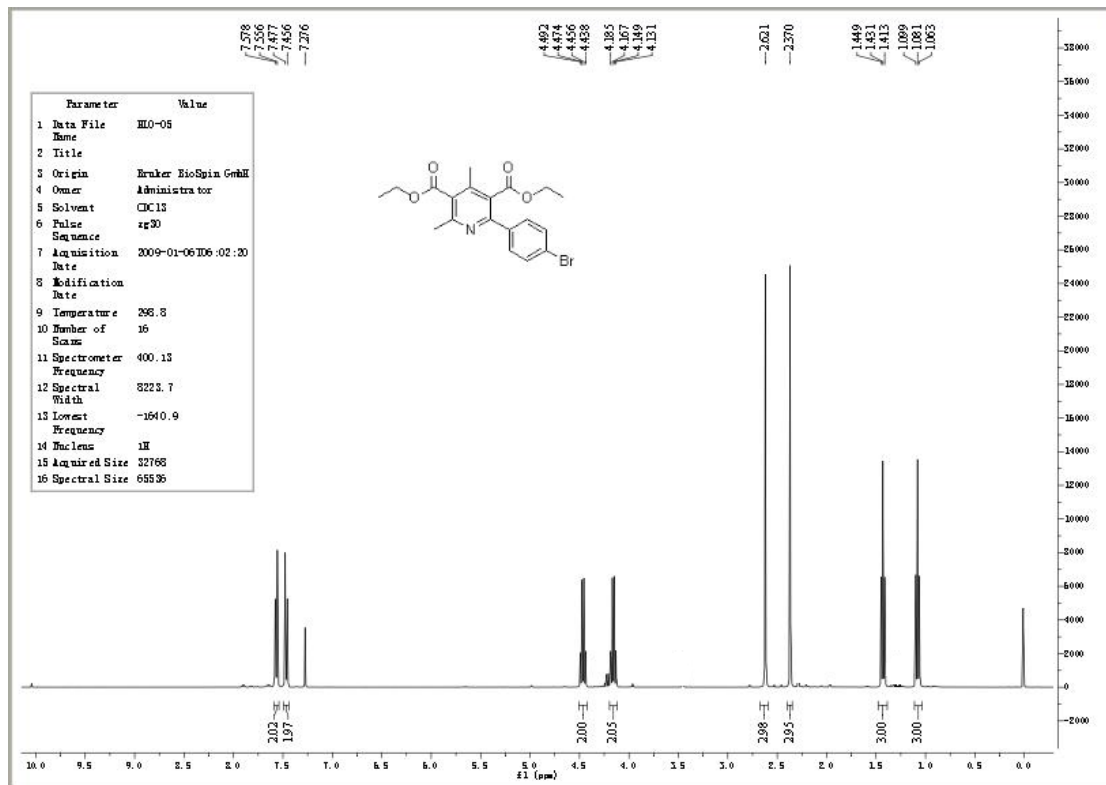

### <sup>13</sup>C NMR:

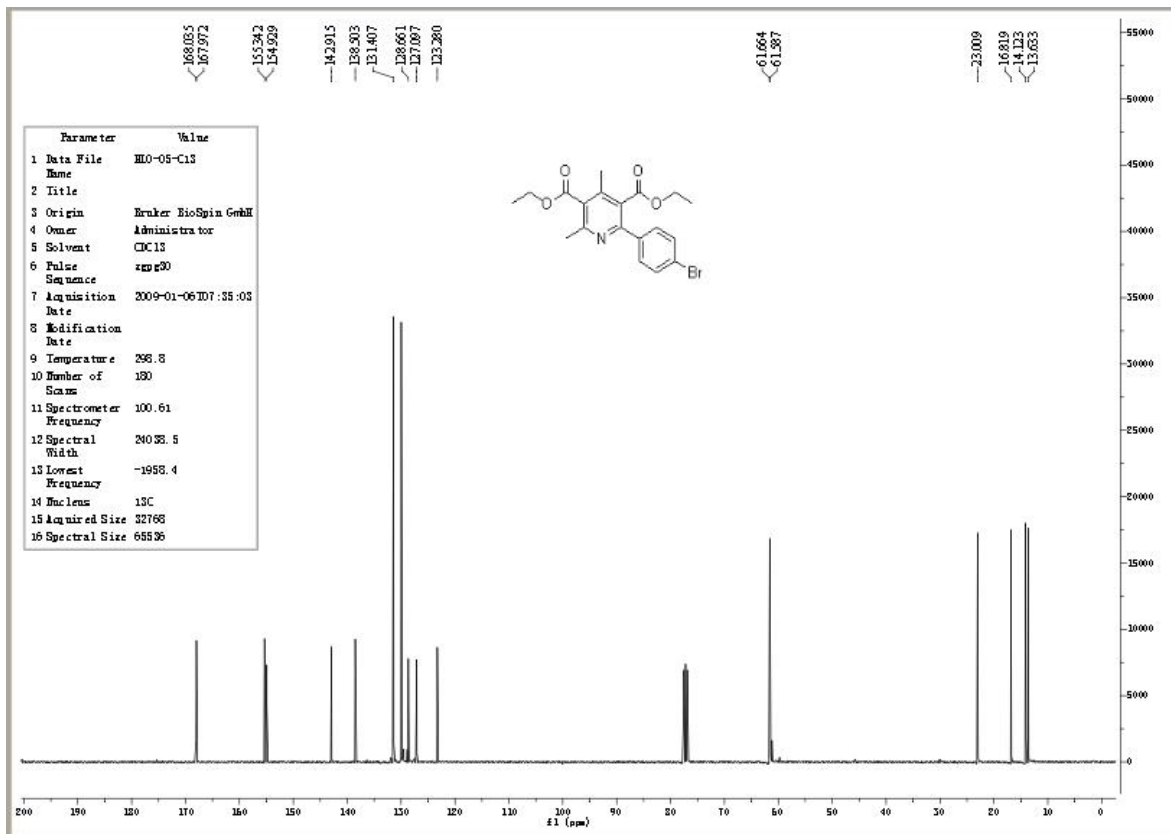

### HRMS:

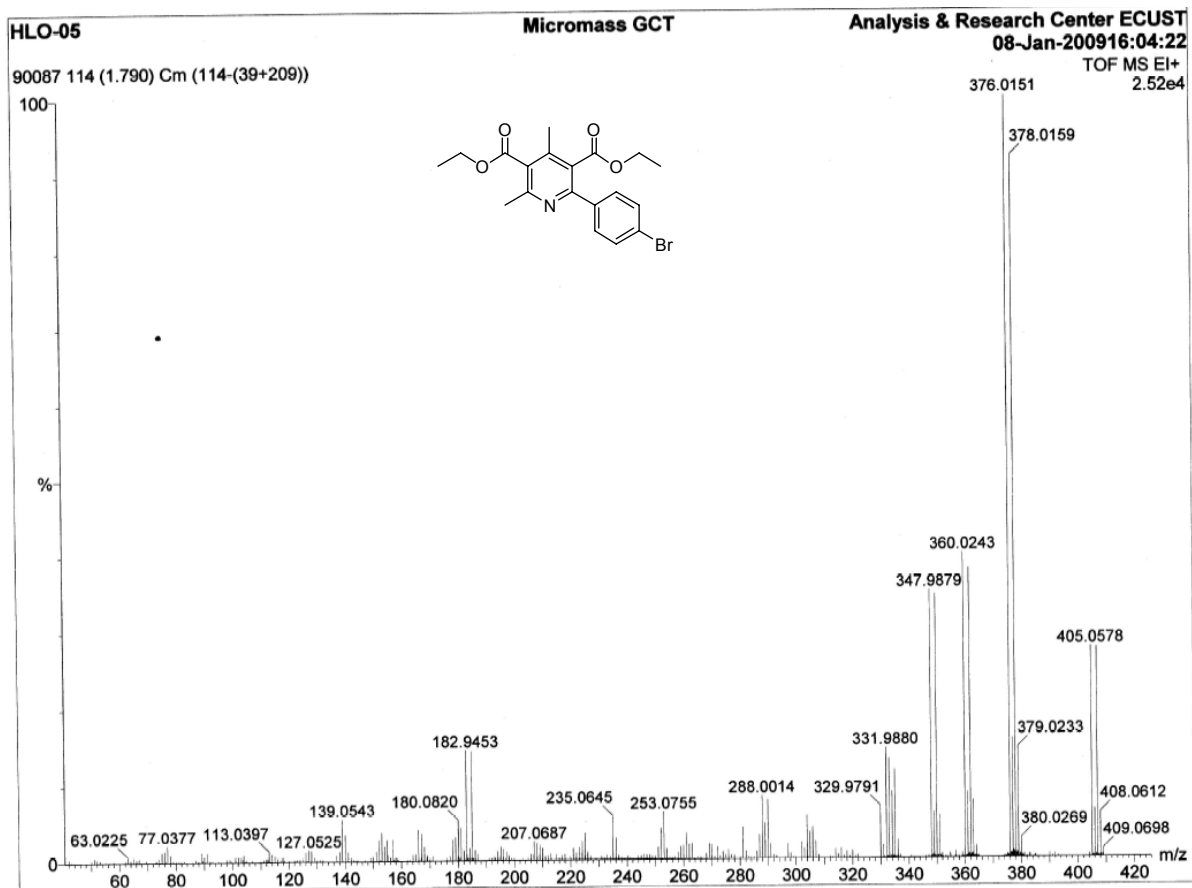



# Dimethyl 2-(4-cyanophenyl)-4,6-dimethylpyridine-3,5-dicarboxylate (3f).

## <sup>1</sup>H NMR:

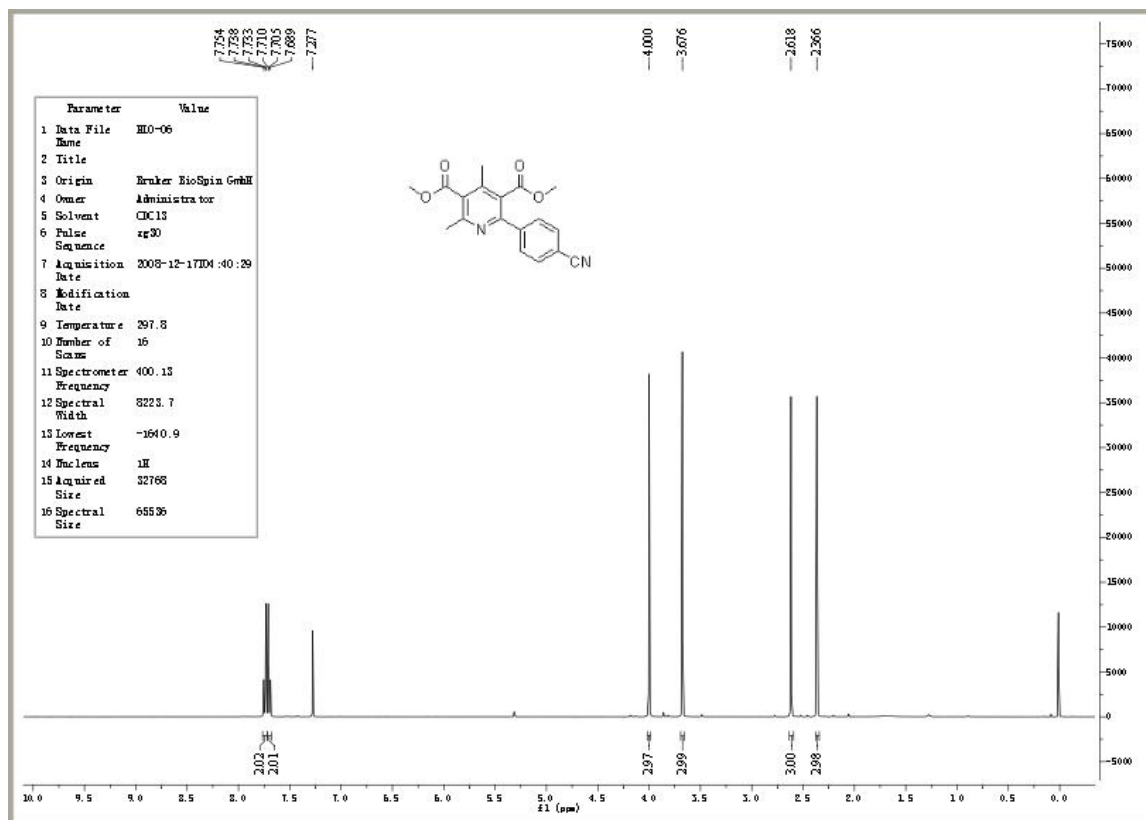

## <sup>13</sup>C NMR:

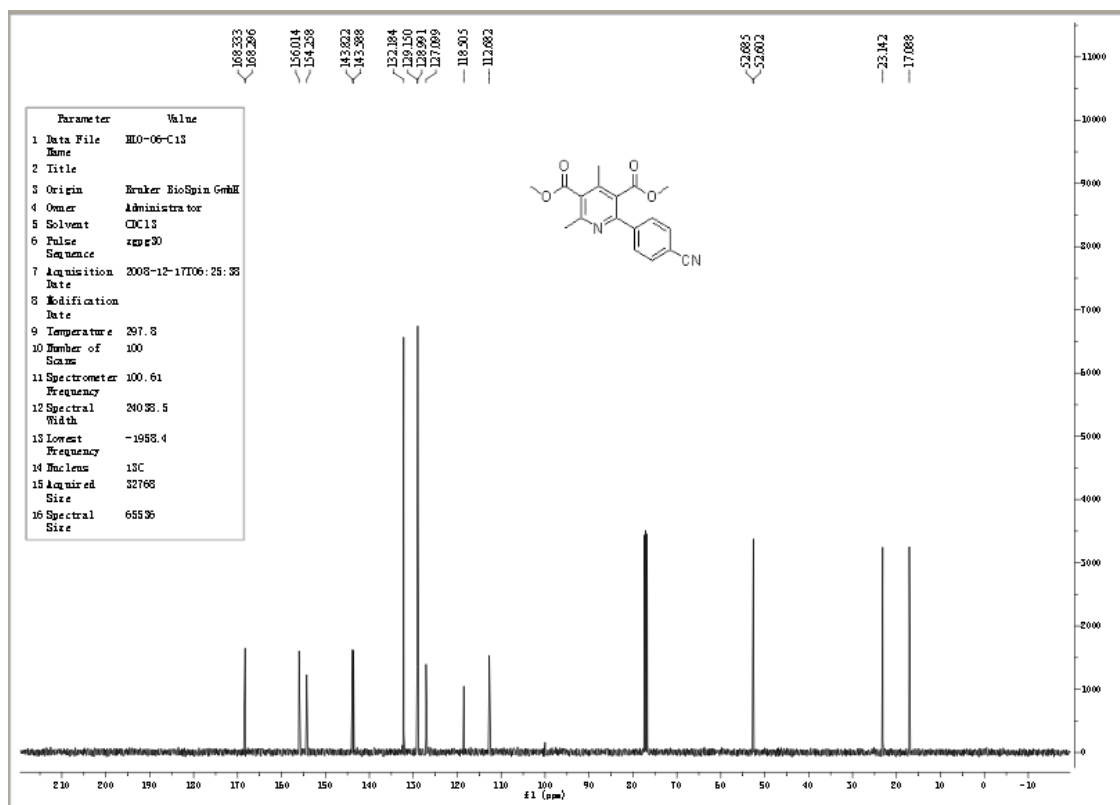

HRMS:

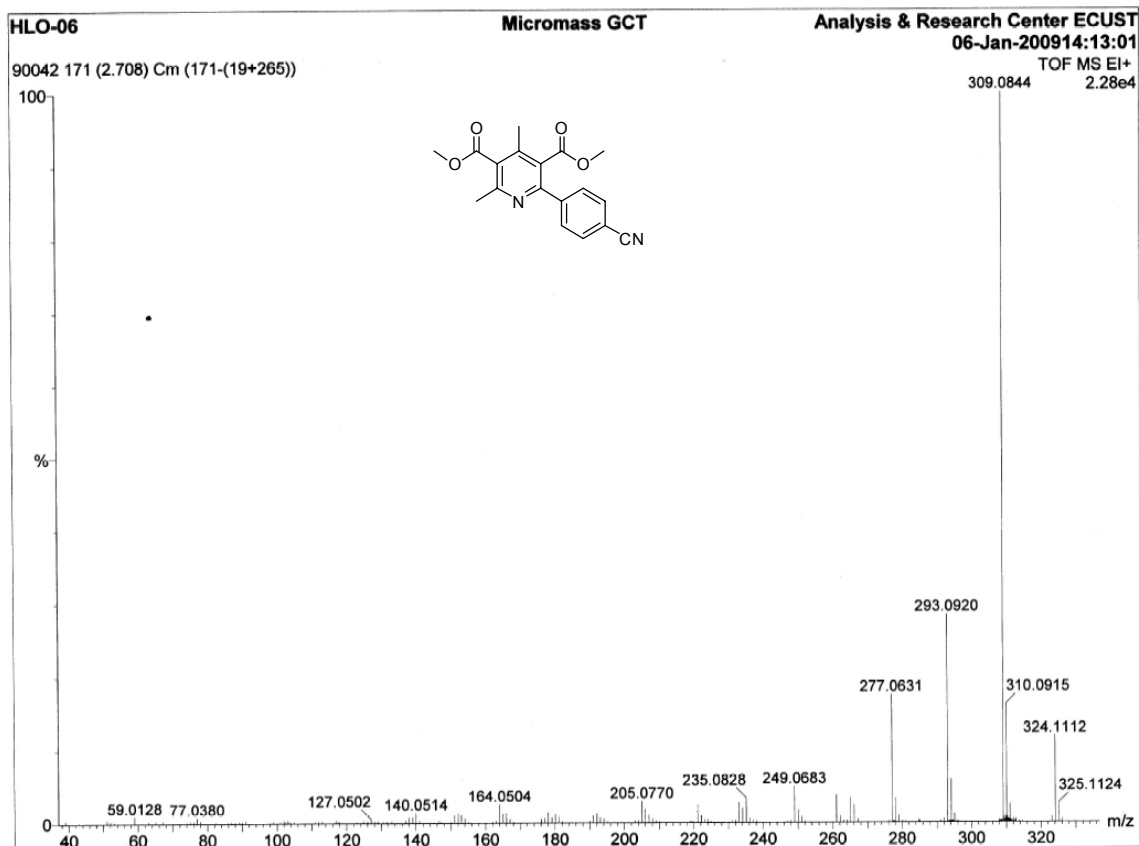

Diethyl 4, 6-dimethyl-2, 3'-bipyridine-3, 5-dicarboxylate (3g).

<sup>1</sup>H NMR:

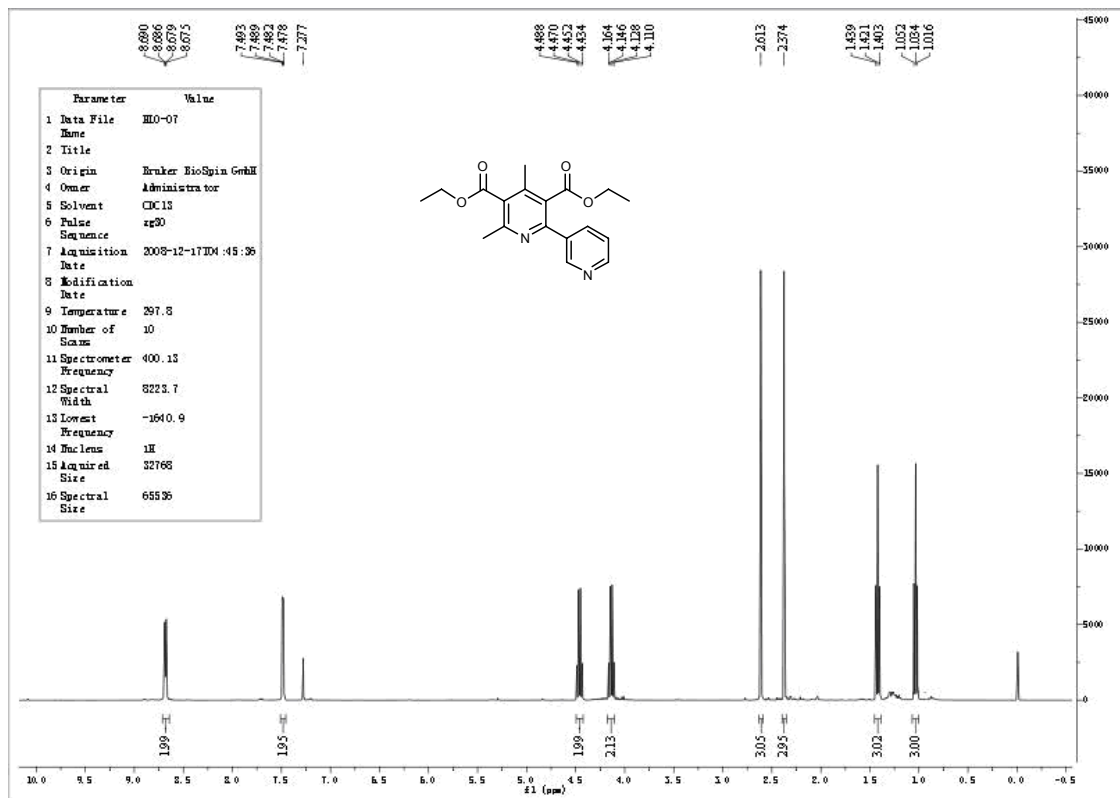

# <sup>13</sup>C NMR:

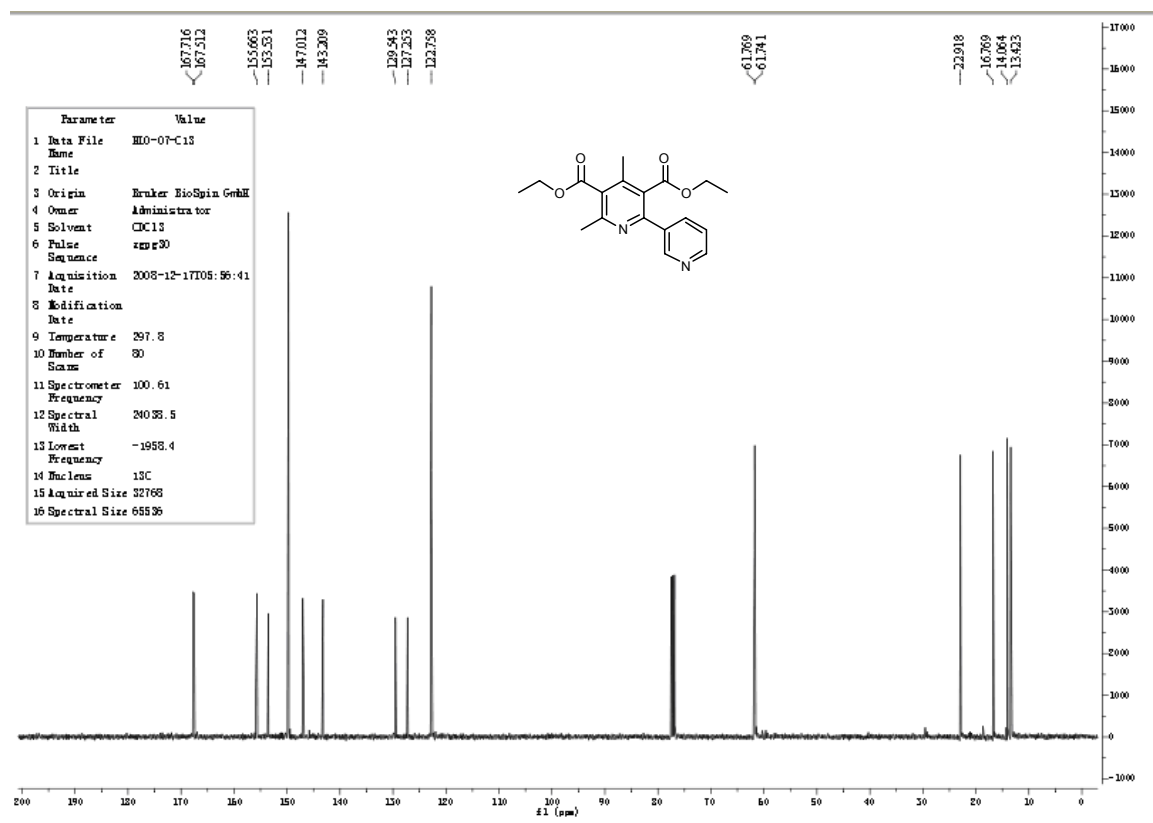

# HRMS:

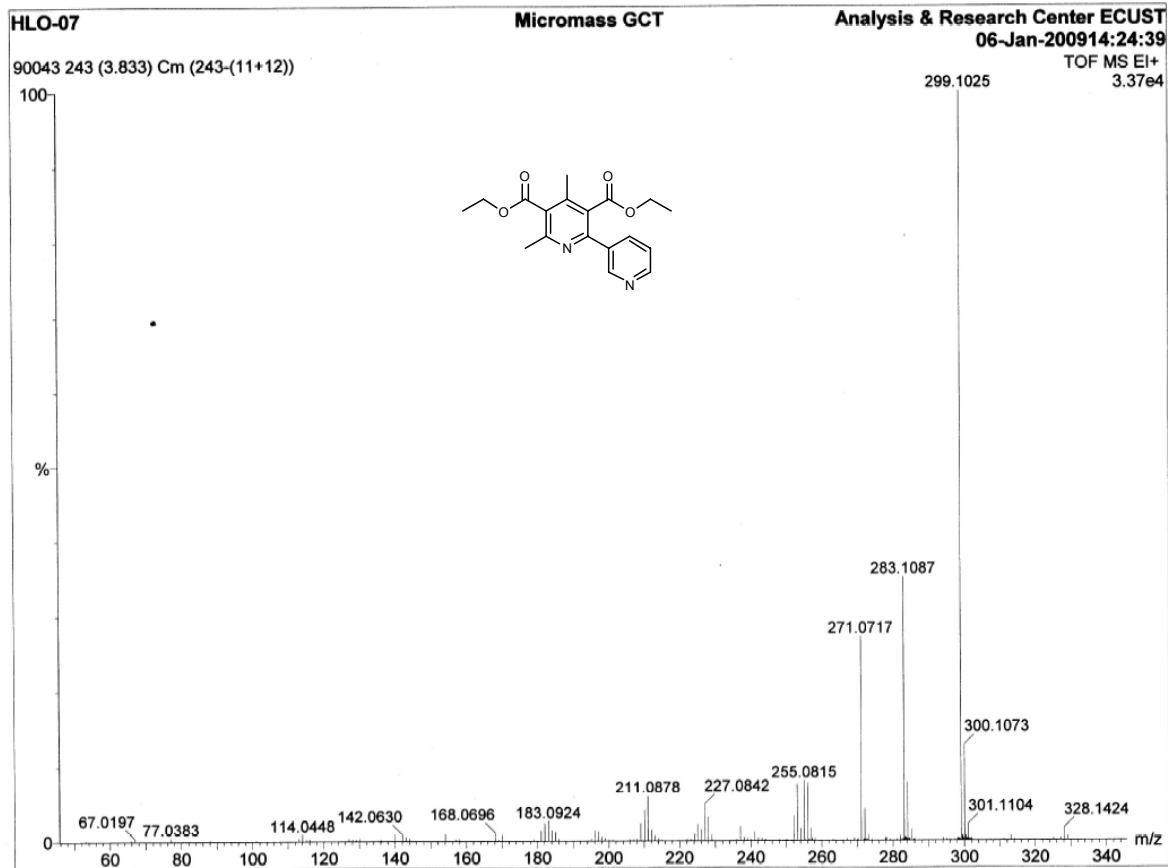

# Dimethyl 2-(4-trifluoromethoxyphenyl)-4, 6-dimethylpyridine-3, 5-dicarboxylate (3h).

## <sup>1</sup>H NMR:

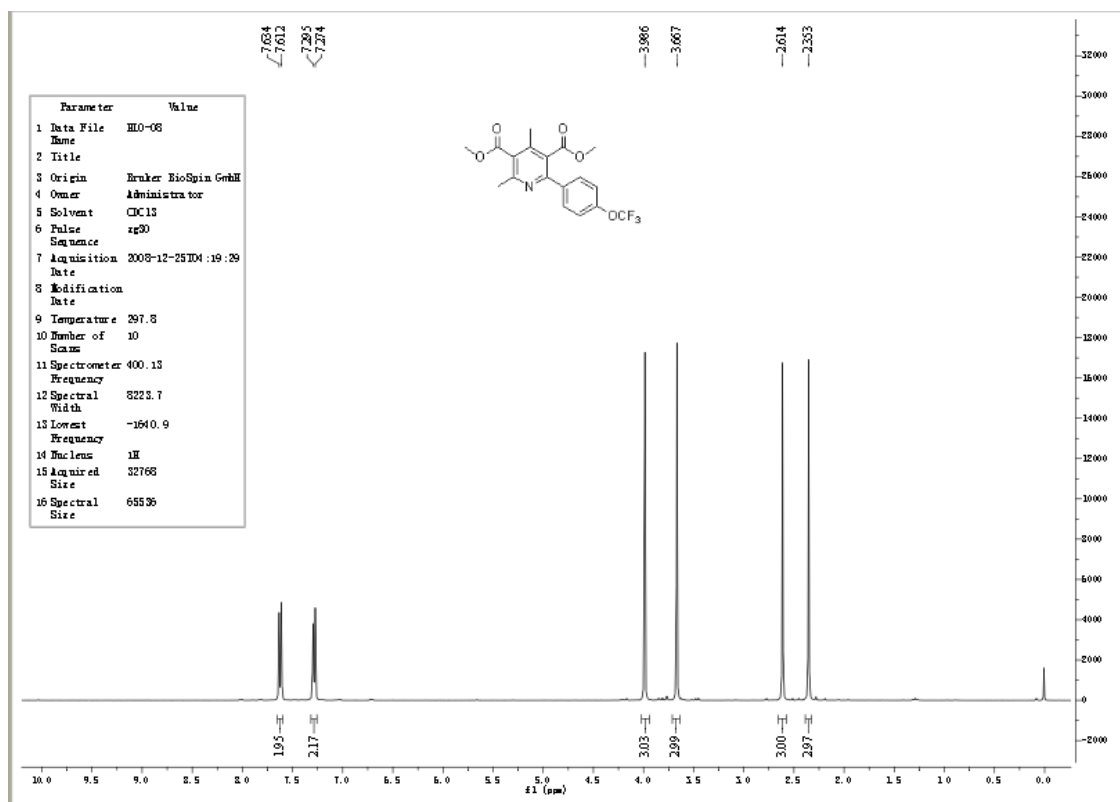

## <sup>13</sup>C NMR:

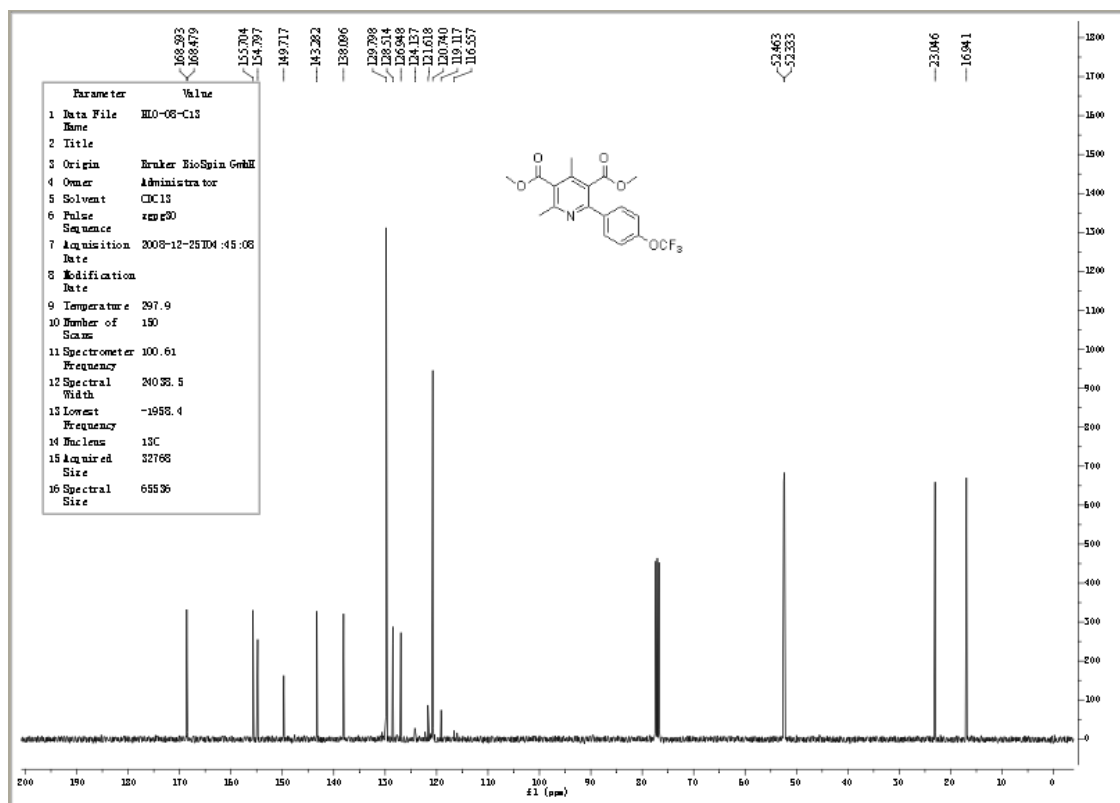

HRMS:

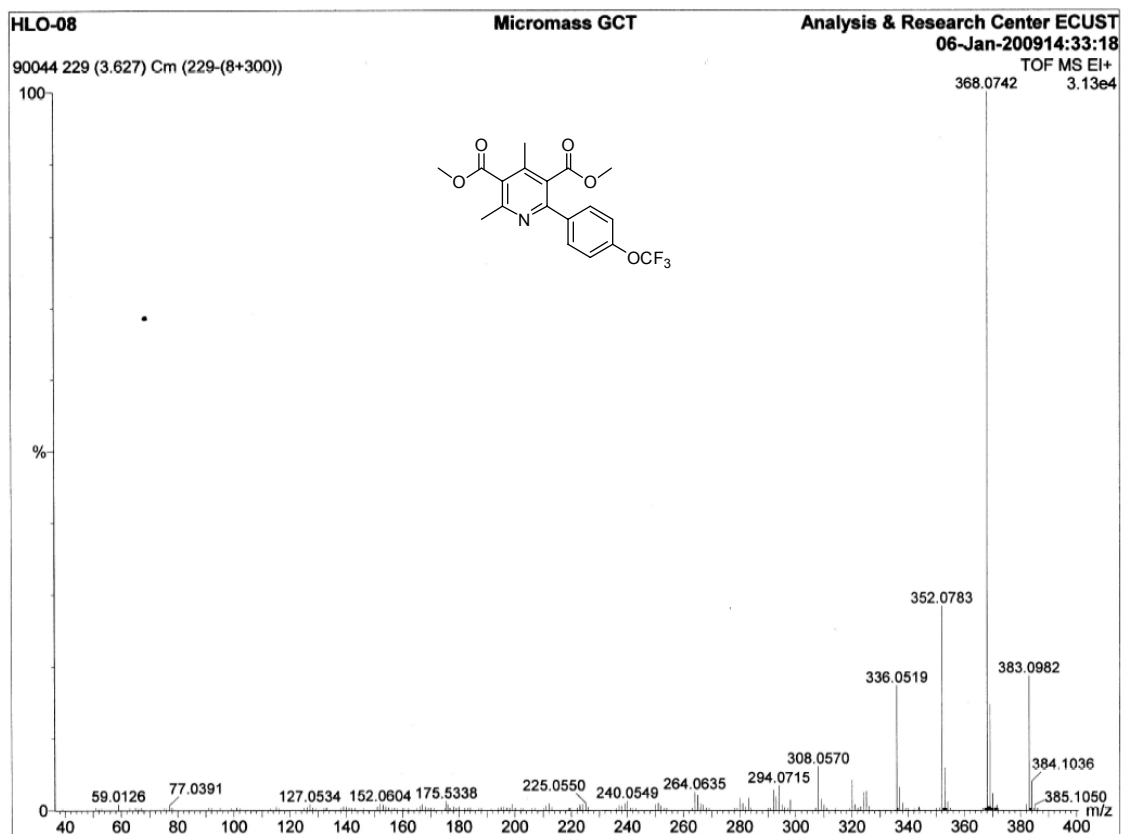

Dimethyl 2-(4-methoxyphenyl)-4,6-dimethylpyridine-3,5-dicarboxylate (3i).

<sup>1</sup>H NMR:

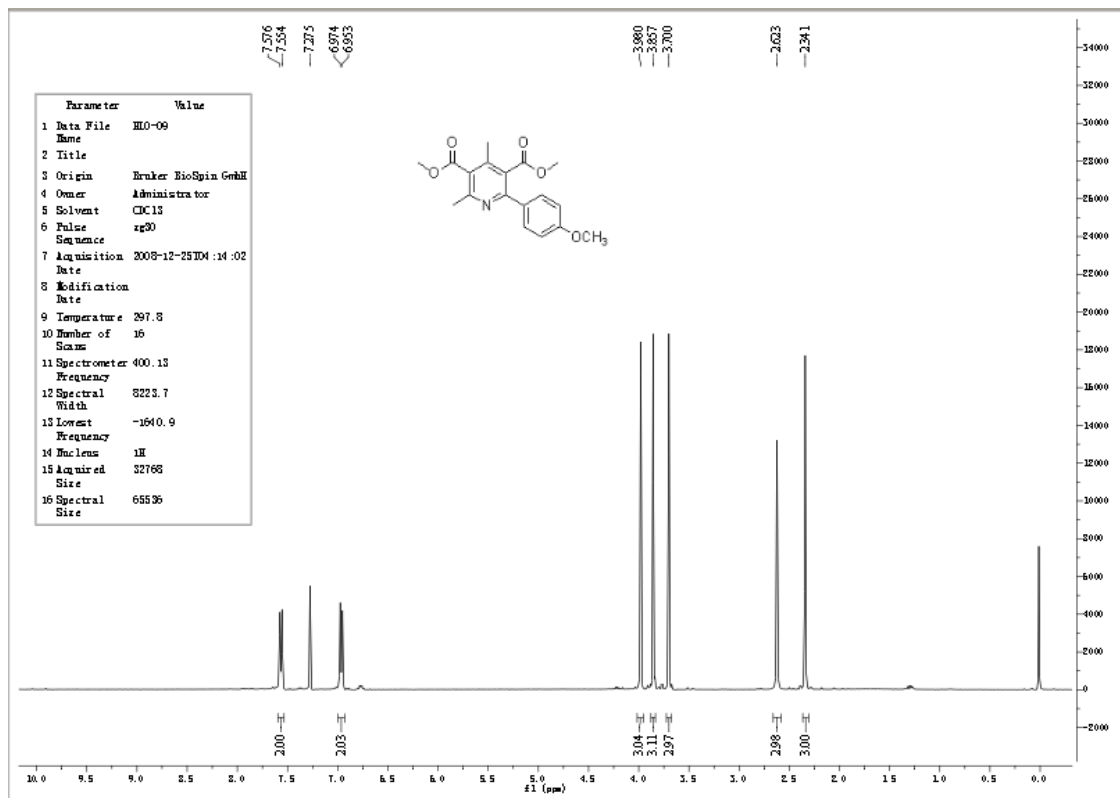

### <sup>13</sup>C NMR:

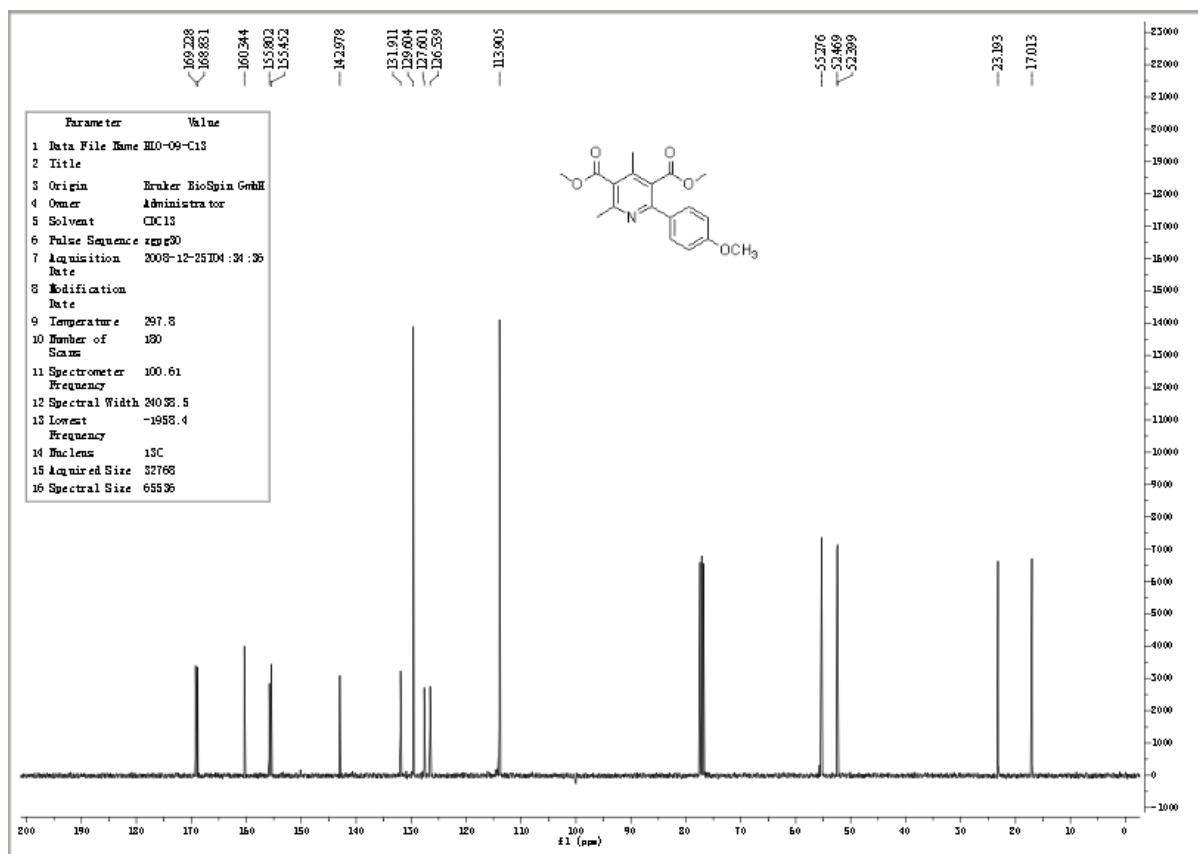

### HRMS:

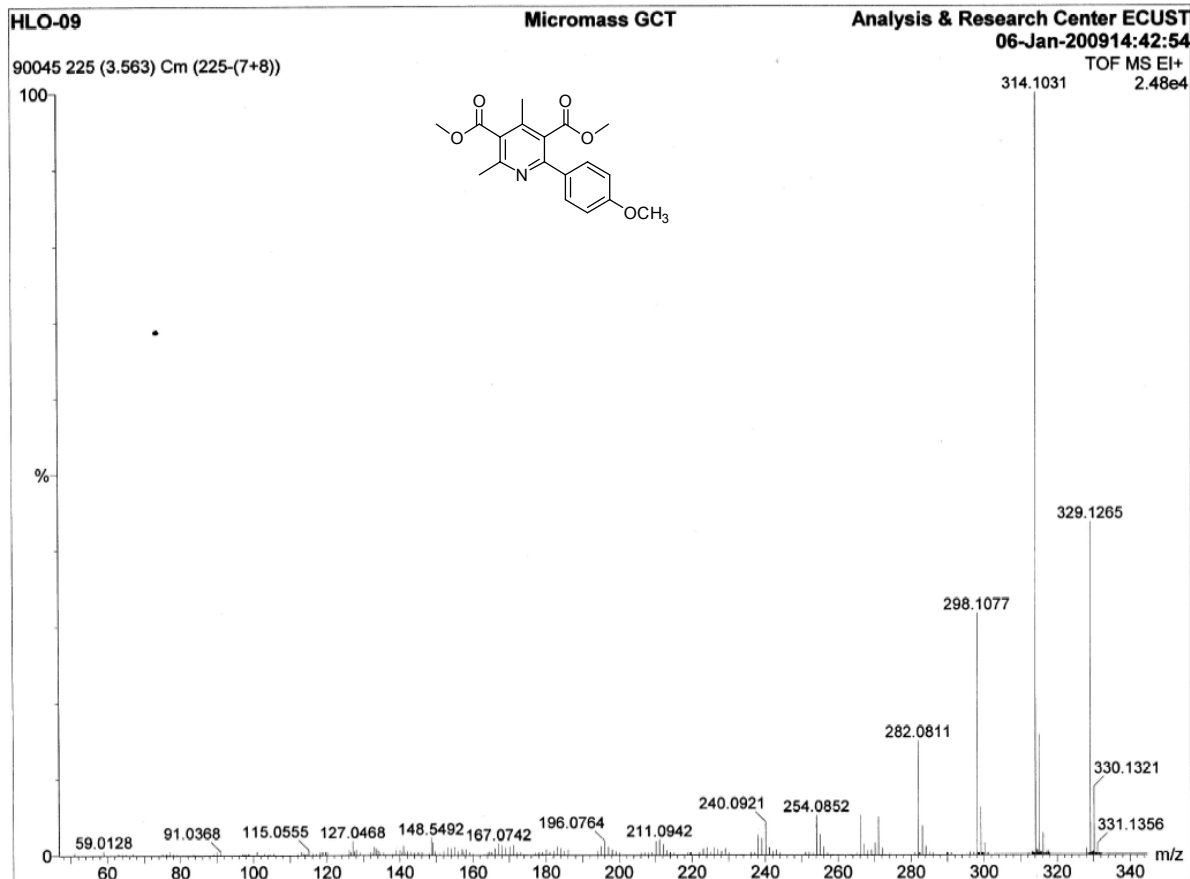

Dimethyl 6'-chloro-4,6-dimethyl-2,3'-bipyridine-3,5-dicarboxylate (3j).

<sup>1</sup>H NMR:

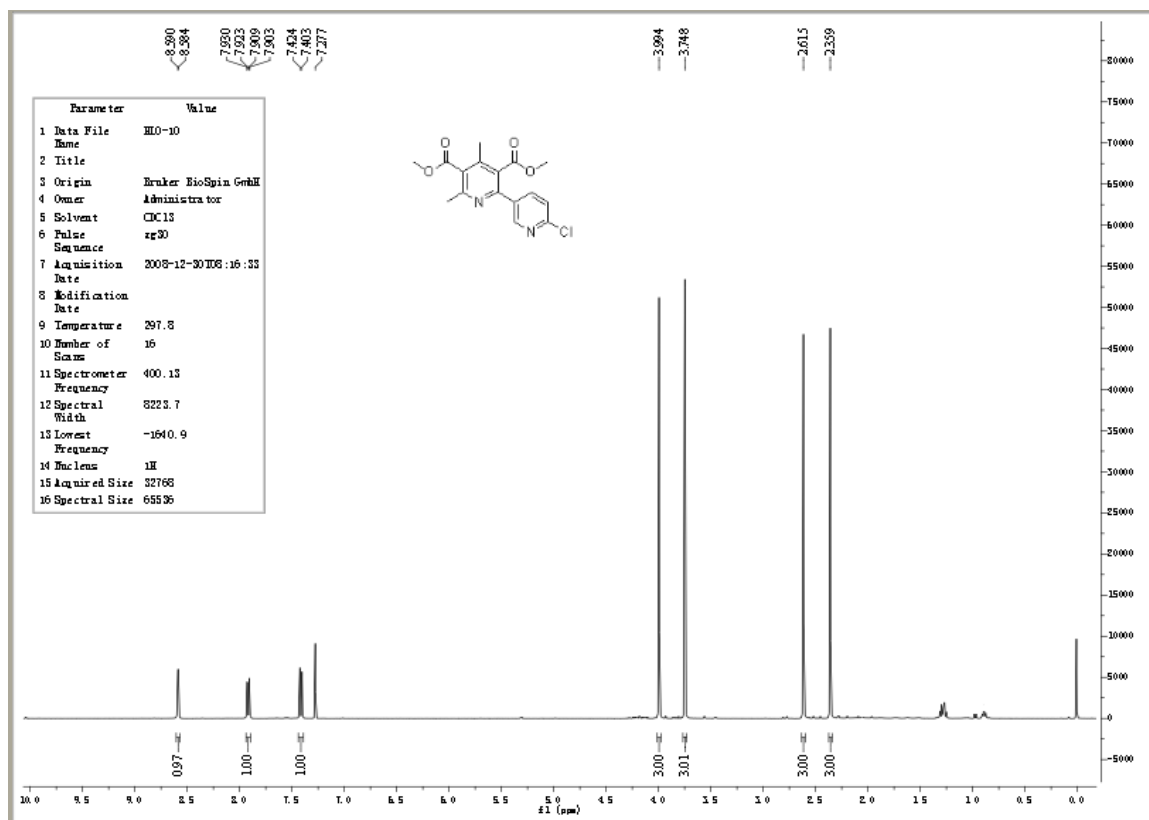

<sup>13</sup>C NMR:

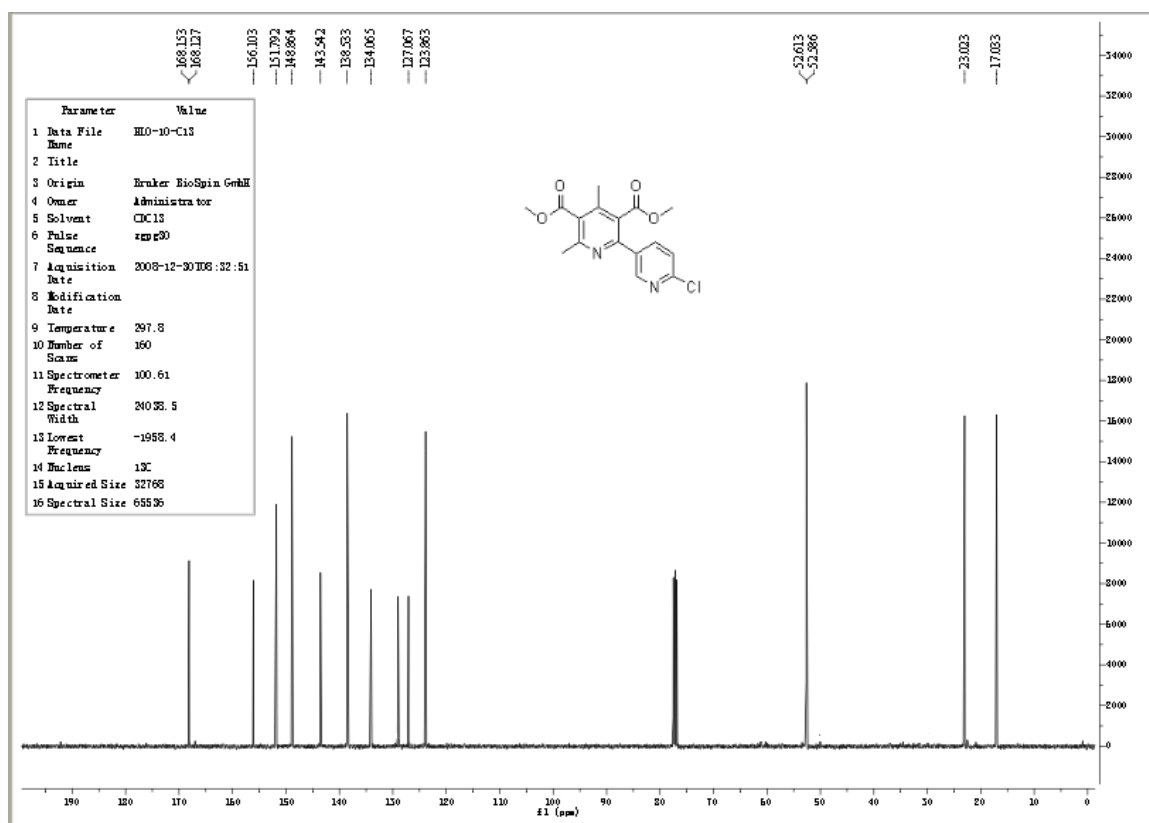

HRMS:

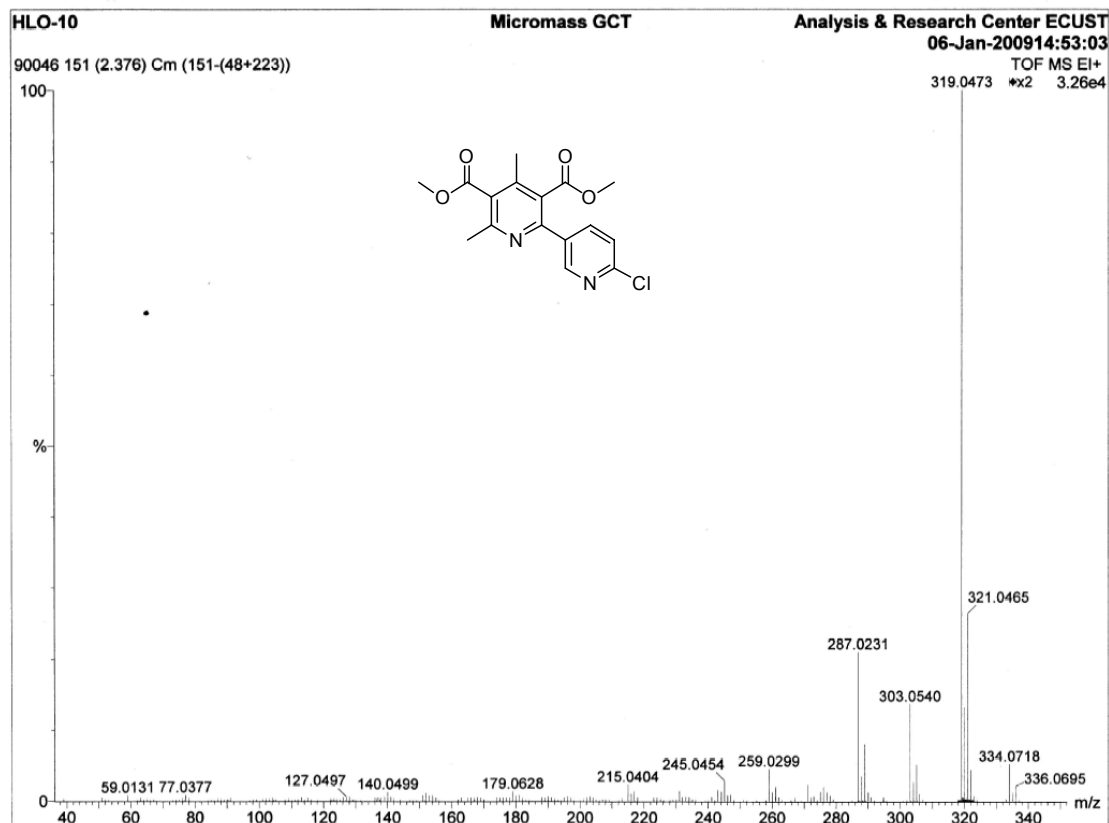

Diethyl 2-(3-bromophenyl)-4,6-dimethylpyridine-3,5-dicarboxylate (3k).

<sup>1</sup>H NMR:

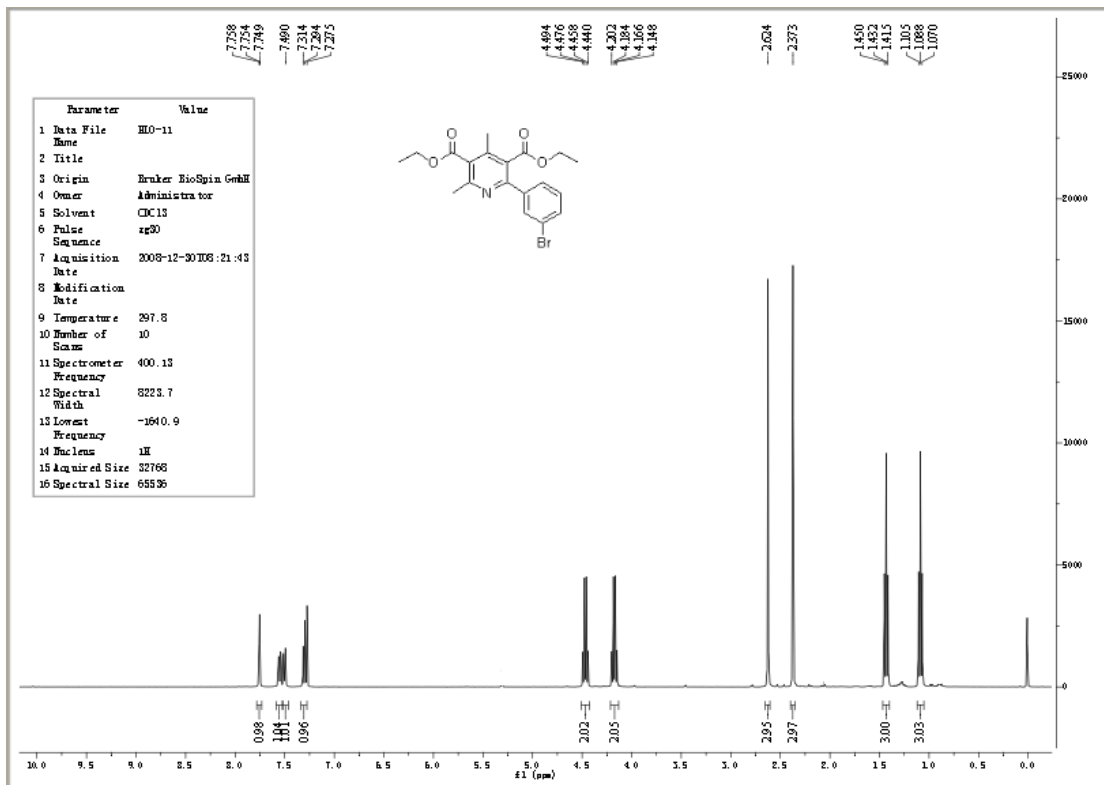



# <sup>13</sup>C NMR:

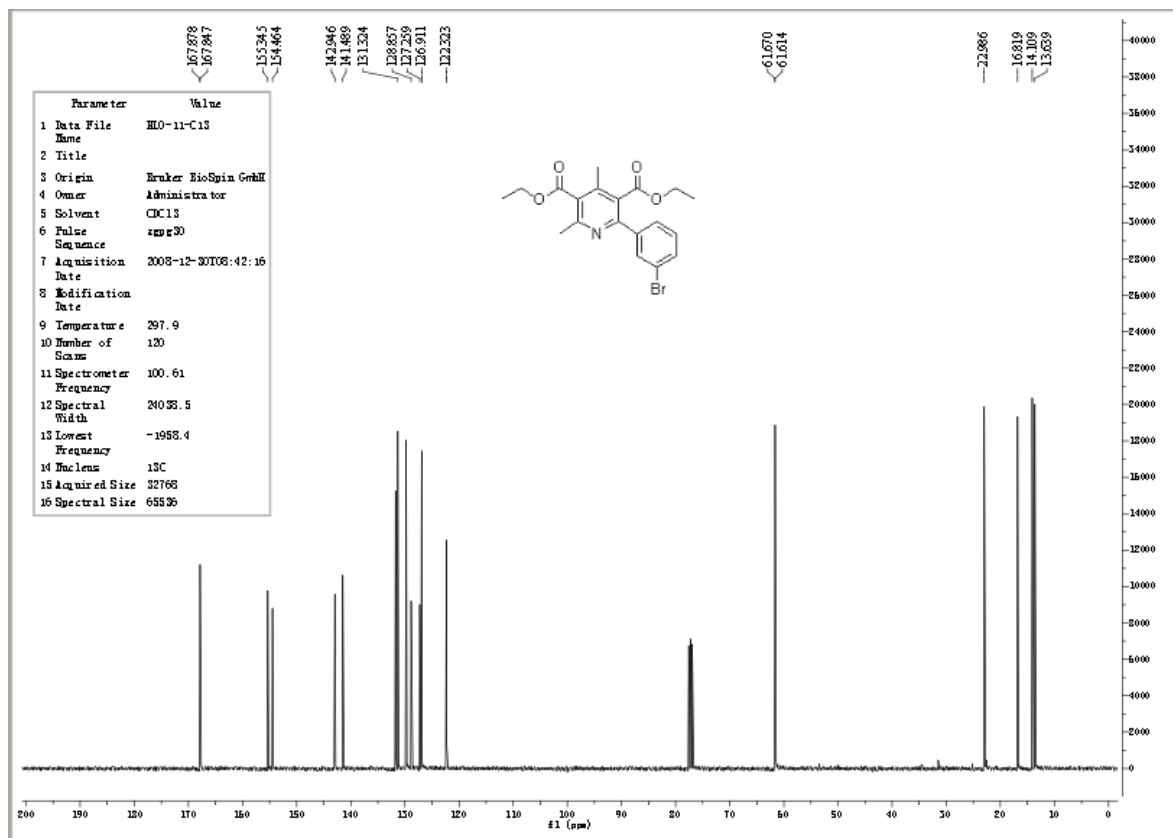

# HRMS:

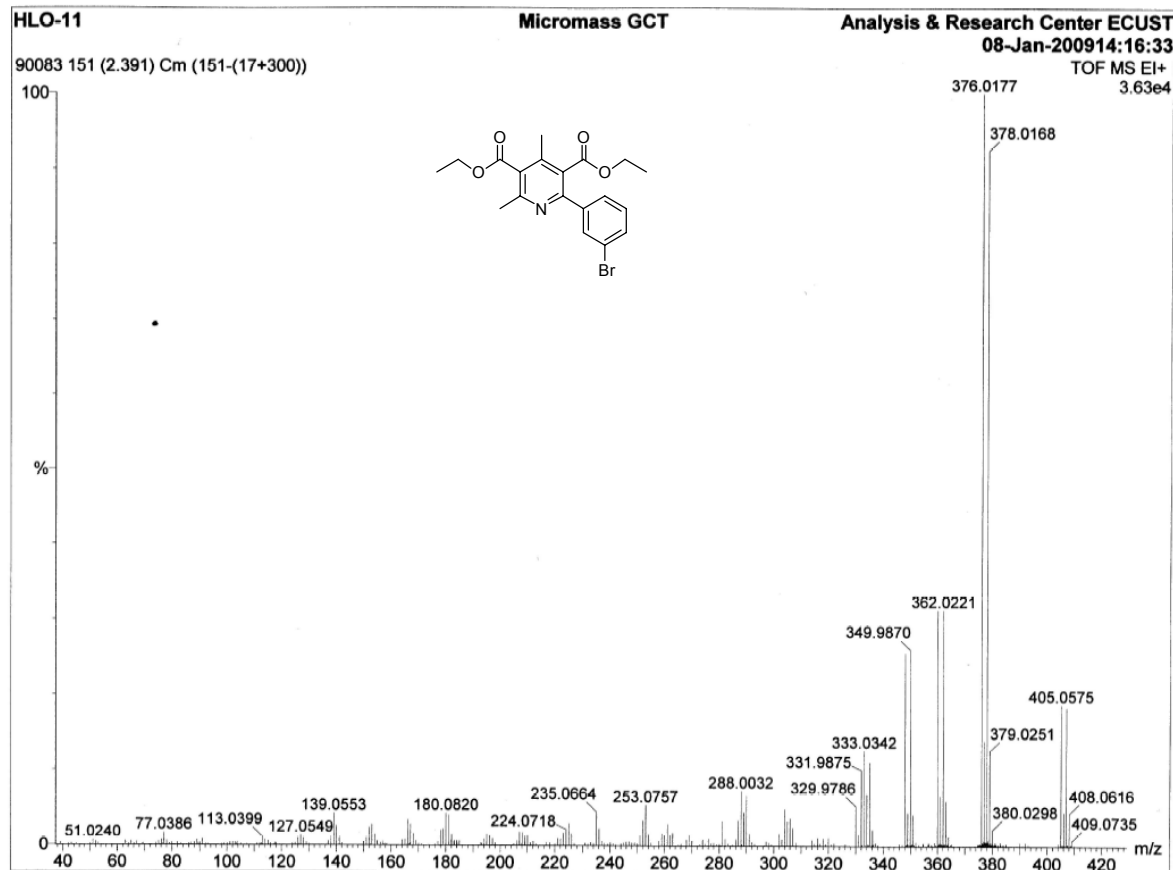

# Dimethyl 2-(4-methylphenyl)-4,6-dimethylpyridine-3,5-dicarboxylate (3l).

## <sup>1</sup>H NMR:

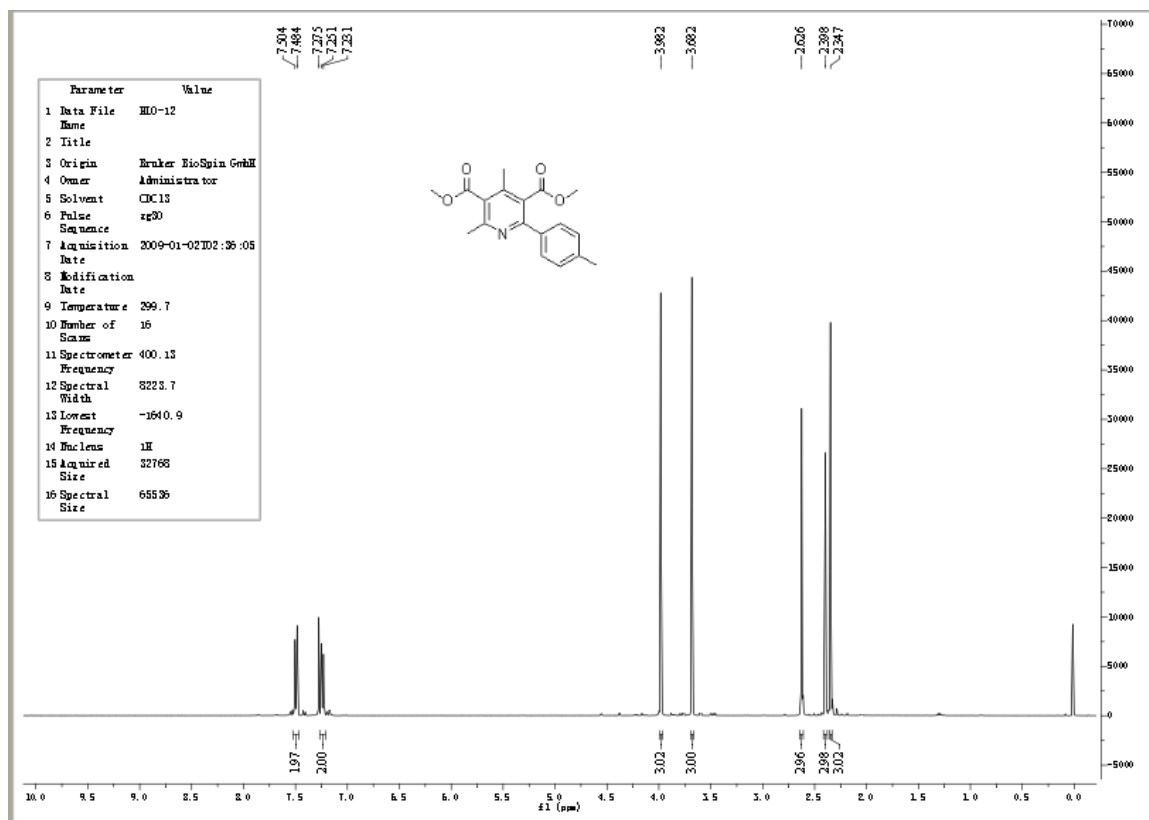

## <sup>13</sup>C NMR:

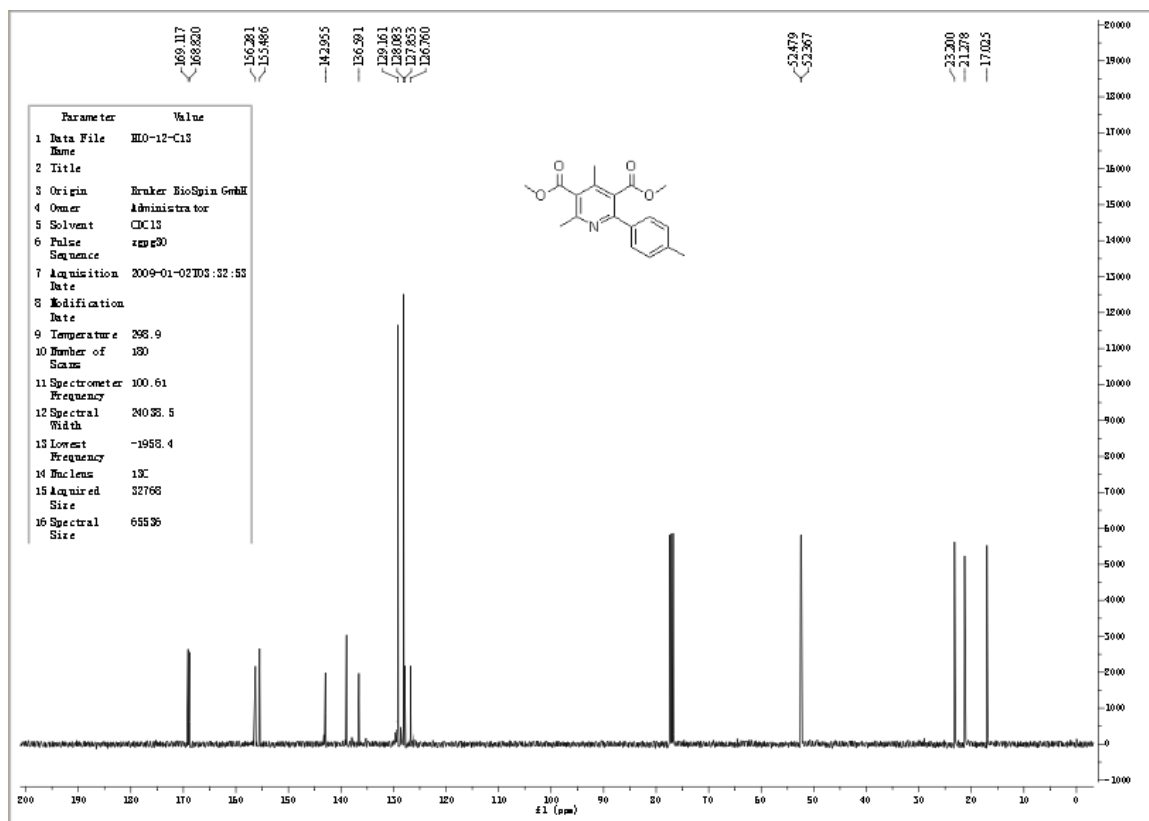

**HRMS:**

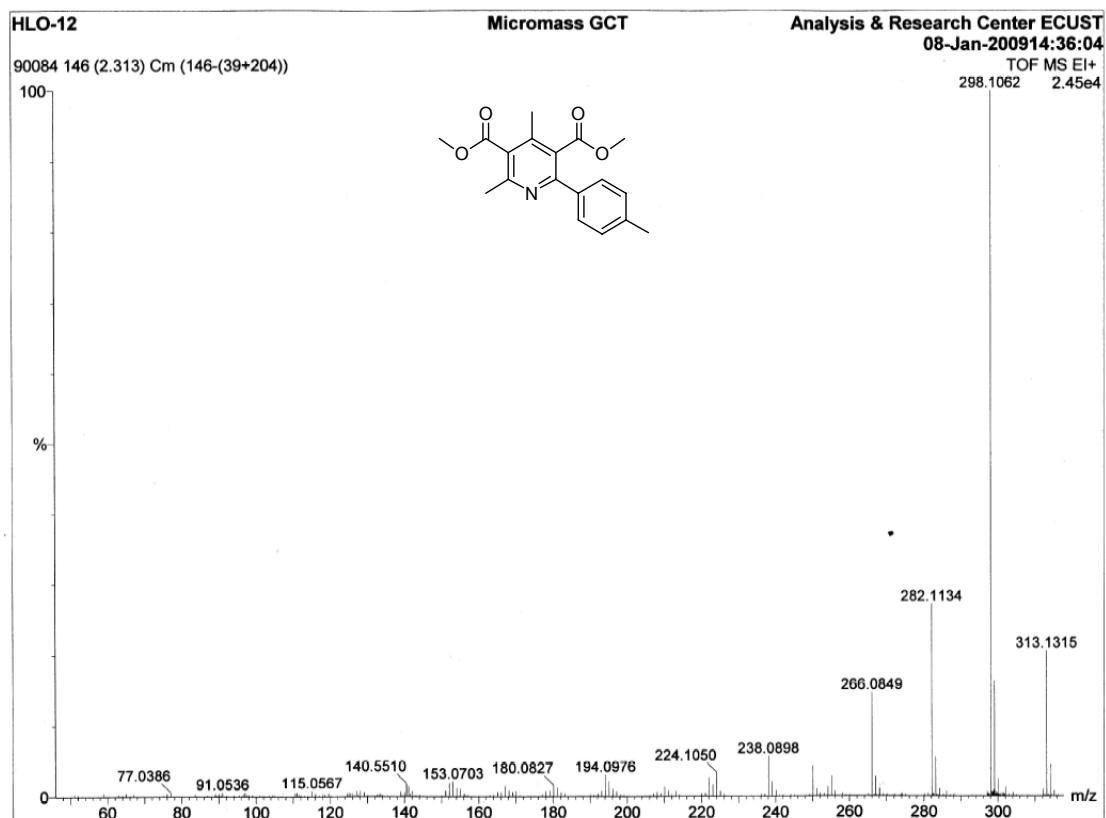

**Diethyl 2-(4-fluorophenyl)-4,6-dimethylpyridine-3,5-dicarboxylate (3m).**

**<sup>1</sup>H NMR:**

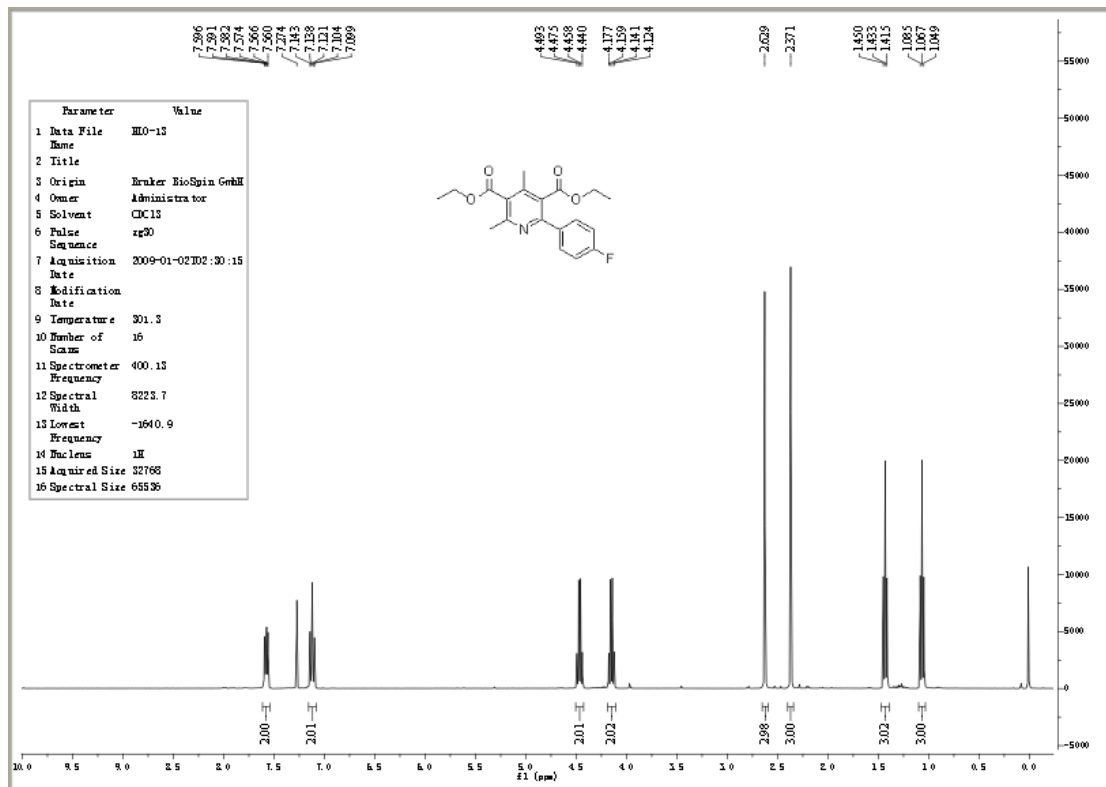

### <sup>13</sup>C NMR:

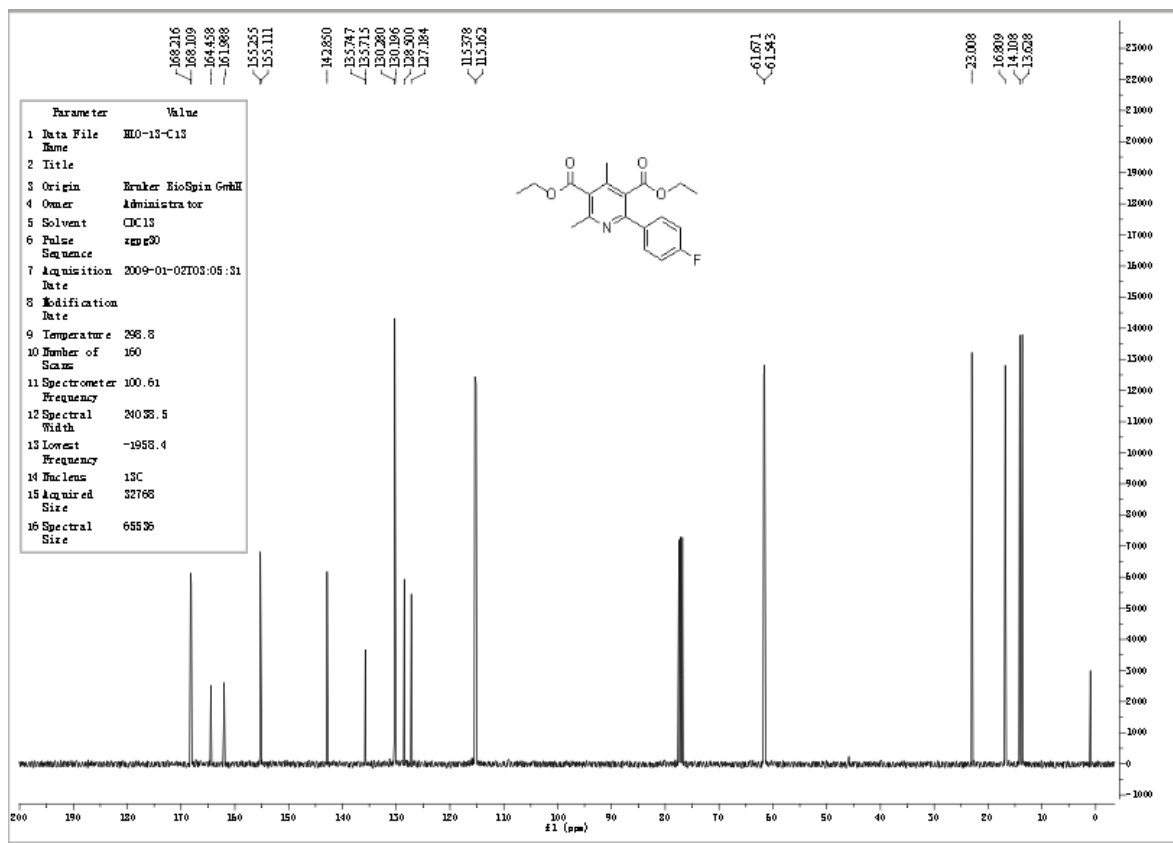

### HRMS:

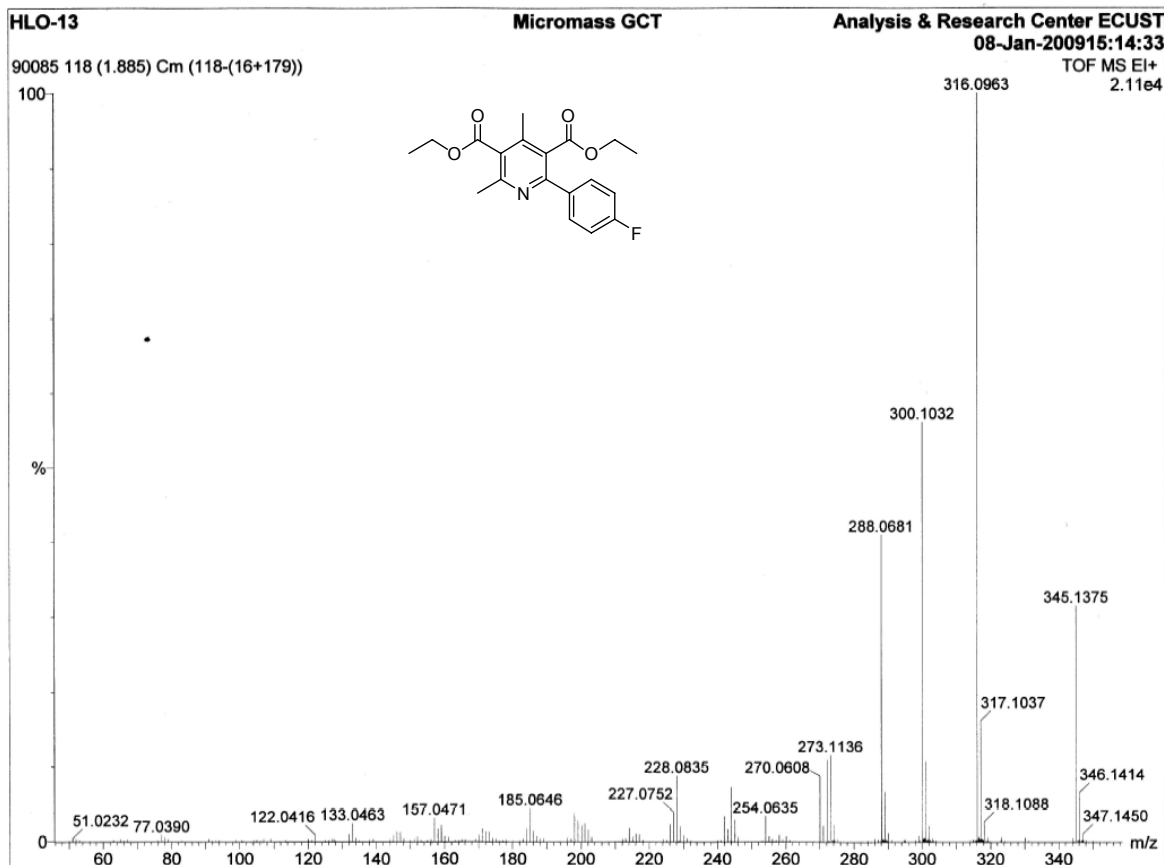

# Dimethyl 2-(4-chlorophenyl)-4,6-dimethylpyridine-3,5-dicarboxylate (3n).

## <sup>1</sup>H NMR:

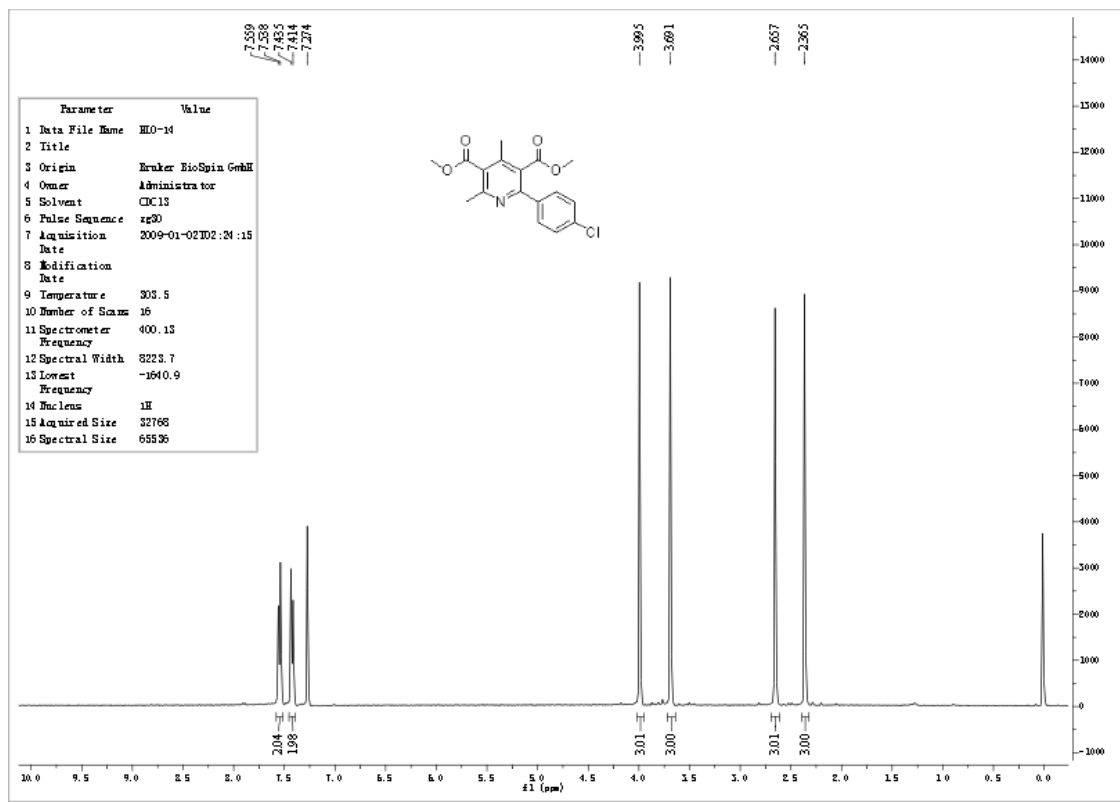

## <sup>13</sup>C NMR:

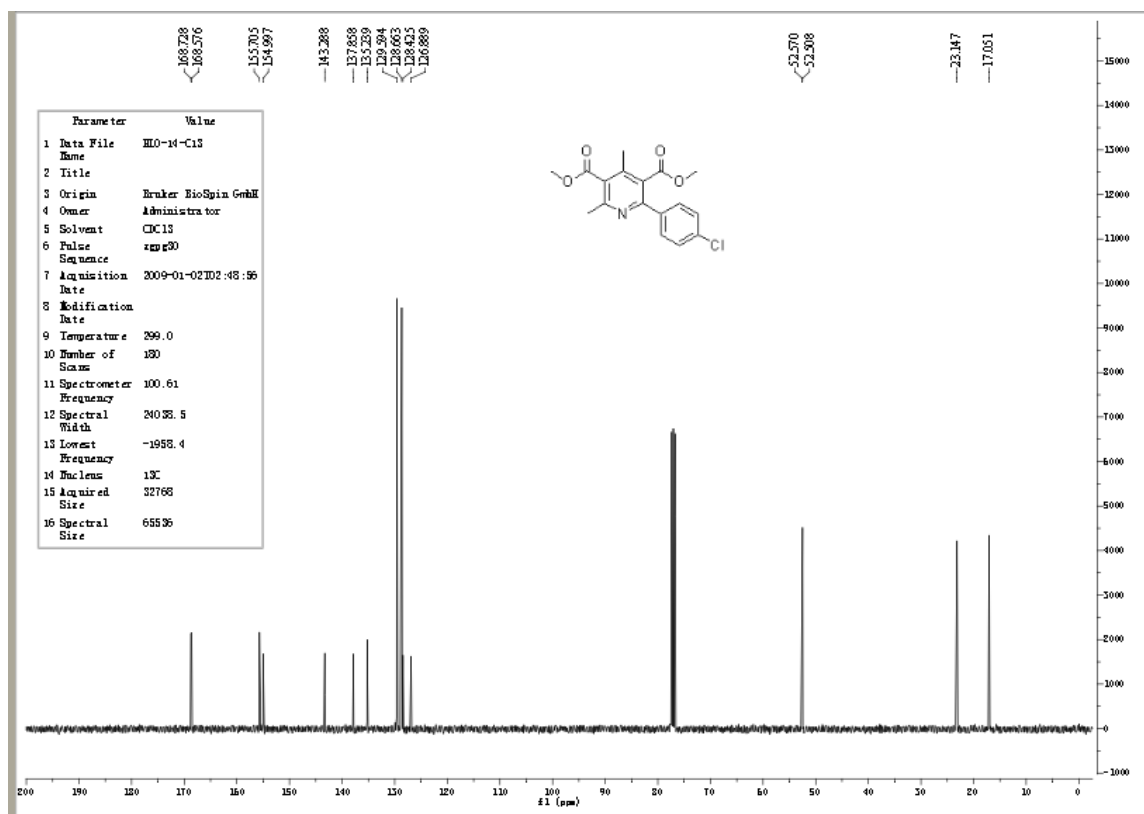

HRMS:

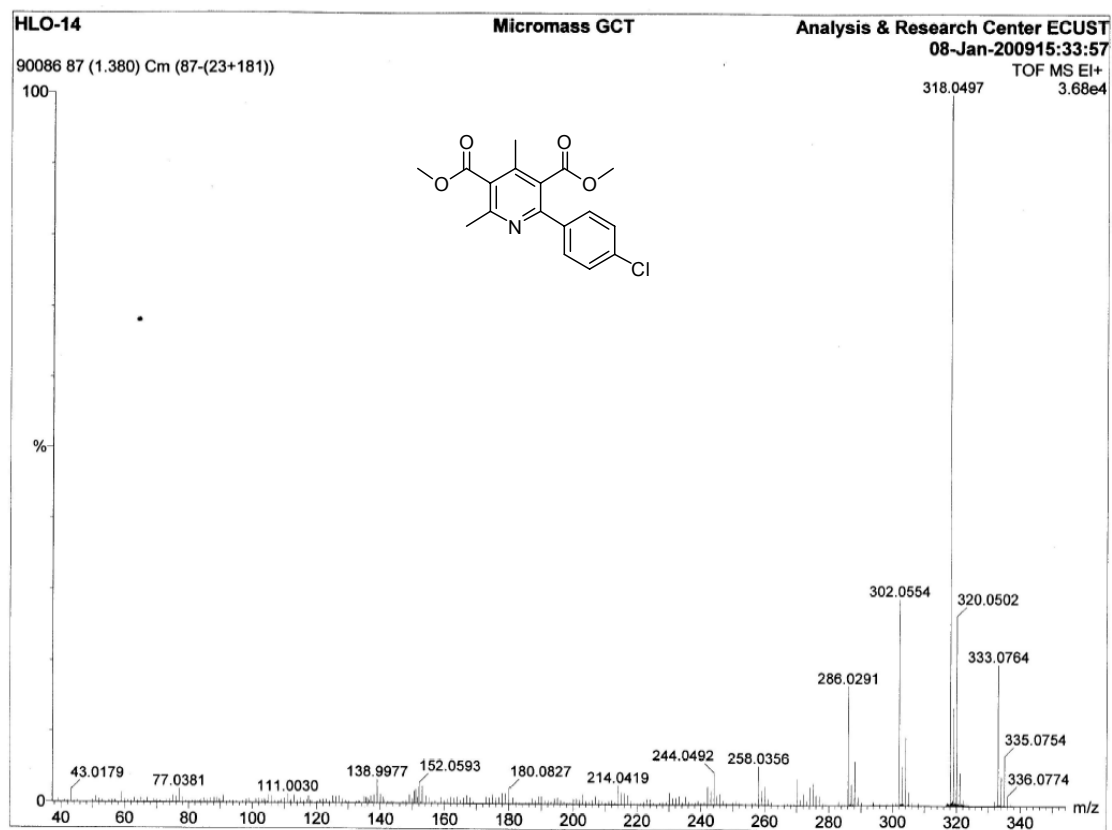

Supplement: b906358g.pdf [file b906358g.pdf]
